# Supplementary material for: Facets of Mindfulness in Stages of Behavior Change Toward Organic Food Consumption
Source: Springer Nature journal article supplement (doi:10.1007/s12671-020-01351-4), 2020-04-02
Supplement: MOESM1 [file 17861714]

## Facets of Mindfulness in the Stages of Action toward Organic Food Consumption

### Supplementary Materials

#### Appendix 1. Used scales and items in English

| Scale                 | Item code   | Item                                                                                                                             | Scale                                                                             |
|-----------------------|-------------|----------------------------------------------------------------------------------------------------------------------------------|-----------------------------------------------------------------------------------|
| Mindfulness           |             |                                                                                                                                  | 5 Point scale from 1 (never or very rarely true) to 5 (very often or always true) |
| Observing             | FFMQ_1beo   | When I'm walking, I deliberately notice the sensations of my body moving.                                                        |                                                                                   |
|                       | FFMQ_15beo  | I pay attention to sensations, such as the wind in my hair or sun on my face.                                                    |                                                                                   |
|                       | FFMQ_26beo  | I notice the smells and aromas of things.                                                                                        |                                                                                   |
|                       | FFMQ_31beo  | I notice visual elements in art or nature, such as colors, shapes, textures, or patterns of light and shadow.                    |                                                                                   |
| Describing            | FFMQ_2bes   | I'm good at finding words to describe my feelings.                                                                               |                                                                                   |
|                       | FFMQ_12besU | It's hard for me to find the words to describe what I'm thinking.                                                                | (r)                                                                               |
|                       | FFMQ_16besU | I have trouble thinking of the right words to express how I feel about things.                                                   | (r)                                                                               |
|                       | FFMQ_37bes  | I can usually describe how I feel at the moment in considerable detail.                                                          |                                                                                   |
| Acting with awareness | FFMQ_5mahU  | When I do things, my mind wanders off and I'm easily distracted.                                                                 | (r)                                                                               |
|                       | FFMQ_8mahU  | I don't pay attention to what I'm doing because I'm daydreaming, worrying, or otherwise distracted.                              | (r)                                                                               |
|                       | FFMQ_13mahU | I am easily distracted.                                                                                                          | (r)                                                                               |
|                       | FFMQ_18mahU | I find it difficult to stay focused on what's happening in the present.                                                          | (r)                                                                               |
| Non-judging           | FFMQ_14aobU | I believe some of my thoughts are abnormal or bad and I shouldn't think that way.                                                | (r)                                                                               |
|                       | FFMQ_17aobU | I make judgments about whether my thoughts are good or bad.                                                                      | (r)                                                                               |
|                       | FFMQ_25aobU | I tell myself that I shouldn't be thinking the way I'm thinking.                                                                 | (r)                                                                               |
|                       | FFMQ_30aobU | I think some of my emotions are bad or inappropriate and I shouldn't feel them.                                                  | (r)                                                                               |
| Nonreactivity         | FFMQ_19nr   | When I have distressing thoughts or images, I "step back" and am aware of the thought or image without getting taken over by it. |                                                                                   |
|                       | FFMQ_24nr   | When I have distressing thoughts or images, I feel calm soon after.                                                              |                                                                                   |
|                       | FFMQ_29nr   | When I have distressing thoughts or images I am able just to notice them without reacting.                                       |                                                                                   |

| FFMQ_33nr                   |            | When I have distressing thoughts or images, I just notice them and let them go.                                                                                      |                                                                     |
|-----------------------------|------------|----------------------------------------------------------------------------------------------------------------------------------------------------------------------|---------------------------------------------------------------------|
| Stage Model                 |            |                                                                                                                                                                      | 5 point scale from 1 (does not apply) to 5 (fully applies)          |
| Goal Intention              | ZielInt_1  | In general, my goal is to buy organic food instead of conventional food.                                                                                             |                                                                     |
|                             | ZielInt_2  | In general, I intent to buy organically grown food instead of conventionally grown food.                                                                             |                                                                     |
| Behavior Intention          | VHInt_1    | In the next four weeks I intent to buy certified organic food instead of conventional.                                                                               |                                                                     |
|                             | VHInt_2    | In the next four weeks I intent to buy products from organic farming during the purchase of food.                                                                    |                                                                     |
| Implementation Intention    | Implnt_1   | I have already informed myself for my next purchase where I can get food in organic quality instead of conventional quality.                                         |                                                                     |
|                             | Implnt_2   | For my next purchase, I have already planned specifically which conventional products I replace with organic food.                                                   |                                                                     |
| Personal Norm               | PNorm_1    | Regardless of the behavior of others, I personally feel obliged to buy organic food as often as possible.                                                            |                                                                     |
|                             | PNorm_2    | My personal values oblige me to choose organic food as often as possible.                                                                                            |                                                                     |
| Social Norm                 | SNorm_1    | Many of the people who are important for me, think I should buy organic instead of conventional foods as often as possible.                                          |                                                                     |
|                             | SNorm_2    | People who are important to me find it good if I prefer organic food.                                                                                                |                                                                     |
| Perceived behaviour control | WVK_1      | For me, to buy organically grown food is... [5 point scale ranging from 1 (very easy) to 5 (very hard)]                                                              |                                                                     |
|                             | WVK_2      | The goal, to buy organically grown food instead of conventional food, I find [5 point scale ranging from 1 (very easy) to 5 (very hard)]                             |                                                                     |
| attitude                    | Einst_1    | I think it's good to buy organic food instead of conventional food.                                                                                                  |                                                                     |
|                             | Einst_2    | There are no benefits for me if I buy certified organic products instead of conventional foods. (r)                                                                  |                                                                     |
| maintenance self-efficacy   | CopingSE_1 | I am sure that, despite some obstacles, I can buy organic food.                                                                                                      |                                                                     |
|                             | CopingSE_2 | I know how to deal with difficulties, when buying organic food.                                                                                                      |                                                                     |
| recovery self-efficacy      | RecovSE_1  | Even when sometimes I am not able to buy organic food, I will not give up that goal.                                                                                 |                                                                     |
|                             | RecovSE_2  | Even when I do not buy organic food sometimes, I am committed to maintain this goal.                                                                                 |                                                                     |
| Stage membership            |            |                                                                                                                                                                      |                                                                     |
| Predecision                 |            | Currently, I mostly buy conventionally produced food and do not intend to change this in the future.                                                                 | categorical answer, participants were asked to choose one statement |
| Preaction                   |            | Currently, I am thinking about more frequently buying organically produced food instead of conventionally produced food, but I am not yet sure how I can realize it. |                                                                     |
| Action                      |            | I intend to buy organically produced food more frequently, and I have already informed myself about how I can realize it.                                            |                                                                     |

|                          |           |                                                                                                                                                                                                                                                              |                                                                                                                                                                               |
|--------------------------|-----------|--------------------------------------------------------------------------------------------------------------------------------------------------------------------------------------------------------------------------------------------------------------|-------------------------------------------------------------------------------------------------------------------------------------------------------------------------------|
| Postaction               |           | I already prefer buying organically produced food as often as possible instead of conventionally produced food, and I intend to maintain this in the future.                                                                                                 |                                                                                                                                                                               |
|                          |           | For me, none of the statements applies, as in my household I am not responsible for buying food.                                                                                                                                                             |                                                                                                                                                                               |
| organic food consumption |           |                                                                                                                                                                                                                                                              | 5 point scale ranging from 1 (never) to 5 (always), alternative option: "I generally do not buy this"                                                                         |
|                          |           | Please indicate how often you are currently buying organic food in the following food sectors:                                                                                                                                                               |                                                                                                                                                                               |
|                          | VH_1      | Vegetables and Fruits                                                                                                                                                                                                                                        |                                                                                                                                                                               |
|                          | VH_2      | Baked goods (for example bread, cakes)                                                                                                                                                                                                                       |                                                                                                                                                                               |
|                          | VH_3      | Dairy products (for example butter, yoghurt, cream)                                                                                                                                                                                                          |                                                                                                                                                                               |
|                          | VH_4      | Meat and fish (for example schnitzel, sausage, cold cuts)                                                                                                                                                                                                    |                                                                                                                                                                               |
|                          | VH_5      | Drinks (for example juices, coffee, wine)                                                                                                                                                                                                                    |                                                                                                                                                                               |
|                          | VH_6      | Sweets (for example chocolate)                                                                                                                                                                                                                               |                                                                                                                                                                               |
|                          | VH_7      | Staple foods (e.g., flour, sugar)                                                                                                                                                                                                                            |                                                                                                                                                                               |
| Quality check items      | Qualität1 | Quality check: please choose the option "often applies"                                                                                                                                                                                                      |                                                                                                                                                                               |
|                          | Qualität2 | Die following question aims to ensure a high quality of our data. Please indicate whether you have read the questions attentively and answered reliable. The answer "no" will not have any negative consequences (for example regarding the raffle) for you. | <p>categorical answers:<br/>         „Yes I have read the questions attentively and answered reliable.“<br/>         or<br/>         “No, my answers should not be used.”</p> |

*Note.* The mindfulness items are taken from the FFMQ (Baer et al., 2008; German version: Michalak et al., 2016). The numeration is equal to the original Questionnaire. All other items are directly translated from German. Recoded Items are marked in the last column. (r) = reversed item.

Appendix 2. Summary of the specific hypotheses

Overview Hypotheses Research Question 1: Mindfulness dimensions as predictors for intentions and organic food consumption

*Which mindfulness dimensions show a relationship with the intentions (goal intention, behavior intention, implementation intention) and self-reported OFC?*

| independent variables | dependent variables |                    |                          |                          | theoretical assumptions/ mechanisms                                                                                                                               |
|-----------------------|---------------------|--------------------|--------------------------|--------------------------|-------------------------------------------------------------------------------------------------------------------------------------------------------------------|
|                       | goal intention      | behavior intention | implementation intention | organic food consumption |                                                                                                                                                                   |
| Observing             | +                   | +                  | +                        | +                        | basic perceptive function of observing of internal and external stimuli, precondition for reflective processes regarding ecological behavior and conscious action |
| Describing            | +                   | +                  | +                        | /                        | ability to describe experiences is crucial for reflective processes and to build up intentions                                                                    |
| Acting with awareness | /                   | /                  | /                        | +                        | consciousness regarding one's actions is relevant to carry out the intended behavior                                                                              |
| Non-Judging           | /                   | /                  | /                        | /                        | without any evaluation of ones thoughts and feeling, reflective processes or building up intentions is unlikely                                                   |
| Nonreactivity         | /                   | /                  | +                        | +                        | a strong impulse control might help to build up an concrete implementation intention and to carry out the intended behavior                                       |

Overview Hypotheses Research Question 2: Mindfulness dimensions and stage-specific variables

*Do relationships between the mindfulness dimensions and the stage-specific variables exist?*

| Independent variables | Dependent variables |                 |                                |                                 | Theoretical assumptions                                                                                                                                                                                                                                                                          |
|-----------------------|---------------------|-----------------|--------------------------------|---------------------------------|--------------------------------------------------------------------------------------------------------------------------------------------------------------------------------------------------------------------------------------------------------------------------------------------------|
|                       | Social norm         | Personal norm   | Attitude                       | Perceived behavior control      |                                                                                                                                                                                                                                                                                                  |
| Observing             | +                   | +               | +                              | +                               | basic perceptive fuction of observing of internal and external stimuli, social norms are clearly observed, observing as precondition for reflective processes regarding personal norms and attitude, helps to plan concrete behavior and therefore connected to perceived behavior control       |
| Describing            | /                   | +               | +                              | +                               | Ability to put thoughts and feelings into words is helpful to engage in reflective processes to build up an personal norm and attitude, helps to build up an intention and therefore , helps to make concrete implementation plans and therefore to build up positive perceived behavior control |
| Acting with awareness | /                   | /               | /                              | +                               | Situational awareness toward acting might help to achieve higher subjective control over one's behavior                                                                                                                                                                                          |
| Non-Judging           | /                   | /               | /                              | /                               | without any evaluation of thoughts and feelings, reflective processes or building up intentions is unlikely                                                                                                                                                                                      |
| Nonreactivity         | /                   | /               | /                              | +                               | The ability to not directly react on upcoming thoughts and feelings might help to gain higher perceived behavior control (e.g. in buying situations)                                                                                                                                             |
| Related Stage         | Precontemplaton     | Precontemplaton | Precontemplaton, Contemplation | Contemplation, Preparation/Test |                                                                                                                                                                                                                                                                                                  |

Overview and Hypotheses Q3: Mean differences on mindfulness between Stages

*Are there differences between the people in the stages of behavior change regarding the five mindfulness dimensions of the FFMQ?*

|                       | Precontemplation | Contemplation | Preparation/<br>Test | Maintenance | Theoretical assumption                                                                                                                                                                                    |
|-----------------------|------------------|---------------|----------------------|-------------|-----------------------------------------------------------------------------------------------------------------------------------------------------------------------------------------------------------|
| Observing             | ↘                | ↘             | ↘                    | ↗           | Due to its basic perceptive function, that helps to transit through preactional and actional stages, observing is higher in people that achieved the stage of maintenance                                 |
| Describing            | ↘                | ↘             | ↗                    | ↗           | The ability to describe thoughts and feelings can help to plan the implementation and the maintenance of a new behavior                                                                                   |
| Acting with awareness | ↘                | ↘             | ↗                    | ↗           | High awareness regarding actions helps to test and carry out the planned behavior, therefore higher in the post-actional stages                                                                           |
| Non-Judging           | ↔                | ↔             | ↔                    | ↔           | without any evaluation of thoughts and feelings, reflective processes or building up intentions is unlikely                                                                                               |
| Non-Reactivity        | ↘                | ↘             | ↗                    | ↗           | The ability to not directly react on upcoming thoughts and feelings might help to gain greater self-regulation toward the intended behavior, therefore nonreactivity is higher in the postactional stages |

*Note.* Expected pattern of the mindfulness dimensions in different stages; ↘ = mean lower than in higher stages; ↗ = mean **significantly** higher than in lower stages; ↔ = no differences between stages expected

Appendix 4. Figure of Model 2

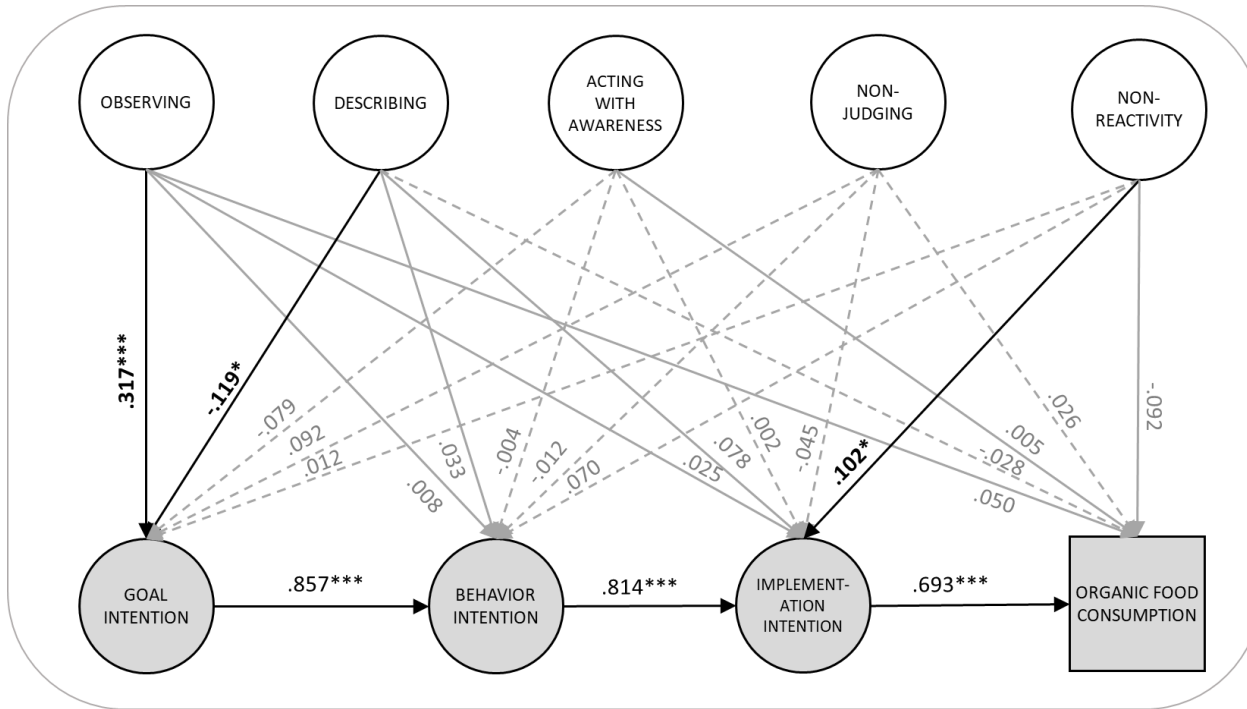

Model 2: Reduced stage model with mindfulness facets as predictors of intentions and behavior

*Note.* Completely standardized coefficients. Dashed arrows = relationship was expected to be non-significant; Continuous arrows = relationship was expected to be significant; Bold lines = significant relationships;

\* $p < .05$ ; \*\* $p < .01$ ; \*\*\* $p < .001$ ;  $N = 560$ ; Model fit (Sattora-Bentler Correction):  $\chi^2(502) = 969.028$ ,  $p < .000$ ; CFI = .952, TLI = .944, RMSEA = .043, SRMR = .051

Appendix 5. R-Outputs of the structural equation models (Parameter Estimates)

Confirmatory Factor Analysis with shortened version of the FFMQ

|    | lhs           | op | rhs           | est   | se    | z      | pvalue | ci.lower | ci.upper | std.lv | std.all | std.noxx |
|----|---------------|----|---------------|-------|-------|--------|--------|----------|----------|--------|---------|----------|
| 1  | Beo           | == | FFMQ_1beo.z   | 1.000 | 0.000 | NA     | NA     | 1.000    | 1.000    | 0.591  | 0.569   | 0.569    |
| 2  | Beo           | == | FFMQ_15beo.z  | 1.219 | 0.114 | 10.669 | 0.000  | 0.995    | 1.443    | 0.720  | 0.710   | 0.710    |
| 3  | Beo           | == | FFMQ_26beo.z  | 0.943 | 0.109 | 8.613  | 0.000  | 0.728    | 1.157    | 0.557  | 0.567   | 0.567    |
| 4  | Beo           | == | FFMQ_31beo.z  | 1.231 | 0.121 | 10.210 | 0.000  | 0.995    | 1.468    | 0.728  | 0.668   | 0.668    |
| 5  | Bes           | == | FFMQ_2bes.z   | 1.000 | 0.000 | NA     | NA     | 1.000    | 1.000    | 0.832  | 0.812   | 0.812    |
| 6  | Bes           | == | FFMQ_12besU.z | 0.964 | 0.047 | 20.619 | 0.000  | 0.872    | 1.056    | 0.802  | 0.801   | 0.801    |
| 7  | Bes           | == | FFMQ_16besU.z | 1.095 | 0.044 | 24.722 | 0.000  | 1.008    | 1.182    | 0.911  | 0.903   | 0.903    |
| 8  | Bes           | == | FFMQ_37bes.z  | 0.831 | 0.044 | 18.936 | 0.000  | 0.745    | 0.917    | 0.691  | 0.711   | 0.711    |
| 9  | Mah           | == | FFMQ_5mahU.z  | 1.000 | 0.000 | NA     | NA     | 1.000    | 1.000    | 0.803  | 0.835   | 0.835    |
| 10 | Mah           | == | FFMQ_8mahU.z  | 0.909 | 0.050 | 18.074 | 0.000  | 0.810    | 1.007    | 0.730  | 0.705   | 0.705    |
| 11 | Mah           | == | FFMQ_13mahU.z | 1.091 | 0.045 | 24.492 | 0.000  | 1.004    | 1.178    | 0.876  | 0.864   | 0.864    |
| 12 | Mah           | == | FFMQ_18mahU.z | 0.974 | 0.050 | 19.531 | 0.000  | 0.876    | 1.072    | 0.782  | 0.779   | 0.779    |
| 13 | Aob           | == | FFMQ_14aobU.z | 1.000 | 0.000 | NA     | NA     | 1.000    | 1.000    | 0.858  | 0.724   | 0.724    |
| 14 | Aob           | == | FFMQ_17aobU.z | 0.741 | 0.062 | 12.042 | 0.000  | 0.621    | 0.862    | 0.636  | 0.553   | 0.553    |
| 15 | Aob           | == | FFMQ_25aobU.z | 0.833 | 0.055 | 15.070 | 0.000  | 0.724    | 0.941    | 0.715  | 0.694   | 0.694    |
| 16 | Aob           | == | FFMQ_30aobU.z | 1.123 | 0.061 | 18.369 | 0.000  | 1.003    | 1.242    | 0.964  | 0.866   | 0.866    |
| 17 | Nr            | == | FFMQ_19nr.z   | 1.000 | 0.000 | NA     | NA     | 1.000    | 1.000    | 0.786  | 0.783   | 0.783    |
| 18 | Nr            | == | FFMQ_24nr.z   | 0.867 | 0.053 | 16.420 | 0.000  | 0.764    | 0.971    | 0.681  | 0.745   | 0.745    |
| 19 | Nr            | == | FFMQ_29nr.z   | 0.724 | 0.058 | 12.527 | 0.000  | 0.611    | 0.837    | 0.569  | 0.608   | 0.608    |
| 20 | Nr            | == | FFMQ_33nr.z   | 0.881 | 0.059 | 14.955 | 0.000  | 0.765    | 0.996    | 0.692  | 0.738   | 0.738    |
| 21 | FFMQ_1beo.z   | ~~ | FFMQ_1beo.z   | 0.729 | 0.052 | 13.912 | 0.000  | 0.627    | 0.832    | 0.729  | 0.676   | 0.676    |
| 22 | FFMQ_15beo.z  | ~~ | FFMQ_15beo.z  | 0.510 | 0.056 | 9.071  | 0.000  | 0.399    | 0.620    | 0.510  | 0.496   | 0.496    |
| 23 | FFMQ_26beo.z  | ~~ | FFMQ_26beo.z  | 0.656 | 0.067 | 9.827  | 0.000  | 0.525    | 0.786    | 0.656  | 0.679   | 0.679    |
| 24 | FFMQ_31beo.z  | ~~ | FFMQ_31beo.z  | 0.657 | 0.062 | 10.602 | 0.000  | 0.536    | 0.778    | 0.657  | 0.554   | 0.554    |
| 25 | FFMQ_2bes.z   | ~~ | FFMQ_2bes.z   | 0.357 | 0.040 | 8.880  | 0.000  | 0.278    | 0.436    | 0.357  | 0.340   | 0.340    |
| 26 | FFMQ_12besU.z | ~~ | FFMQ_12besU.z | 0.359 | 0.036 | 9.973  | 0.000  | 0.288    | 0.429    | 0.359  | 0.358   | 0.358    |
| 27 | FFMQ_16besU.z | ~~ | FFMQ_16besU.z | 0.188 | 0.031 | 6.167  | 0.000  | 0.129    | 0.248    | 0.188  | 0.185   | 0.185    |
| 28 | FFMQ_37bes.z  | ~~ | FFMQ_37bes.z  | 0.466 | 0.041 | 11.429 | 0.000  | 0.386    | 0.546    | 0.466  | 0.494   | 0.494    |
| 29 | FFMQ_5mahU.z  | ~~ | FFMQ_5mahU.z  | 0.279 | 0.026 | 10.660 | 0.000  | 0.228    | 0.330    | 0.279  | 0.302   | 0.302    |
| 30 | FFMQ_8mahU.z  | ~~ | FFMQ_8mahU.z  | 0.540 | 0.040 | 13.360 | 0.000  | 0.461    | 0.619    | 0.540  | 0.504   | 0.504    |
| 31 | FFMQ_13mahU.z | ~~ | FFMQ_13mahU.z | 0.261 | 0.030 | 8.606  | 0.000  | 0.202    | 0.320    | 0.261  | 0.254   | 0.254    |
| 32 | FFMQ_18mahU.z | ~~ | FFMQ_18mahU.z | 0.396 | 0.033 | 11.962 | 0.000  | 0.331    | 0.461    | 0.396  | 0.393   | 0.393    |
| 33 | FFMQ_14aobU.z | ~~ | FFMQ_14aobU.z | 0.669 | 0.058 | 11.556 | 0.000  | 0.555    | 0.782    | 0.669  | 0.476   | 0.476    |
| 34 | FFMQ_17aobU.z | ~~ | FFMQ_17aobU.z | 0.918 | 0.056 | 16.451 | 0.000  | 0.809    | 1.028    | 0.918  | 0.694   | 0.694    |
| 35 | FFMQ_25aobU.z | ~~ | FFMQ_25aobU.z | 0.551 | 0.044 | 12.613 | 0.000  | 0.466    | 0.637    | 0.551  | 0.519   | 0.519    |
| 36 | FFMQ_30aobU.z | ~~ | FFMQ_30aobU.z | 0.311 | 0.040 | 7.754  | 0.000  | 0.232    | 0.389    | 0.311  | 0.251   | 0.251    |
| 37 | FFMQ_19nr.z   | ~~ | FFMQ_19nr.z   | 0.390 | 0.049 | 8.000  | 0.000  | 0.295    | 0.486    | 0.390  | 0.387   | 0.387    |
| 38 | FFMQ_24nr.z   | ~~ | FFMQ_24nr.z   | 0.371 | 0.035 | 10.481 | 0.000  | 0.302    | 0.441    | 0.371  | 0.444   | 0.444    |
| 39 | FFMQ_29nr.z   | ~~ | FFMQ_29nr.z   | 0.553 | 0.043 | 12.940 | 0.000  | 0.469    | 0.636    | 0.553  | 0.631   | 0.631    |
| 40 | FFMQ_33nr.z   | ~~ | FFMQ_33nr.z   | 0.400 | 0.045 | 8.949  | 0.000  | 0.312    | 0.488    | 0.400  | 0.455   | 0.455    |
| 41 | Beo           | ~~ | Beo           | 0.349 | 0.054 | 6.460  | 0.000  | 0.243    | 0.455    | 1.000  | 1.000   | 1.000    |
| 42 | Bes           | ~~ | Bes           | 0.692 | 0.058 | 11.936 | 0.000  | 0.578    | 0.805    | 1.000  | 1.000   | 1.000    |



|    |     |    |     |       |       |        |       |        |       |       |       |       |
|----|-----|----|-----|-------|-------|--------|-------|--------|-------|-------|-------|-------|
| 43 | Mah | ~~ | Mah | 0.645 | 0.049 | 13.153 | 0.000 | 0.549  | 0.741 | 1.000 | 1.000 | 1.000 |
| 44 | Aob | ~~ | Aob | 0.737 | 0.077 | 9.536  | 0.000 | 0.585  | 0.888 | 1.000 | 1.000 | 1.000 |
| 45 | Nr  | ~~ | Nr  | 0.618 | 0.060 | 10.227 | 0.000 | 0.499  | 0.736 | 1.000 | 1.000 | 1.000 |
| 46 | Beo | ~~ | Bes | 0.128 | 0.032 | 4.048  | 0.000 | 0.066  | 0.190 | 0.261 | 0.261 | 0.261 |
| 47 | Beo | ~~ | Mah | 0.085 | 0.029 | 2.936  | 0.003 | 0.028  | 0.141 | 0.178 | 0.178 | 0.178 |
| 48 | Beo | ~~ | Aob | 0.043 | 0.029 | 1.473  | 0.141 | -0.014 | 0.099 | 0.084 | 0.084 | 0.084 |
| 49 | Beo | ~~ | Nr  | 0.114 | 0.030 | 3.749  | 0.000 | 0.054  | 0.173 | 0.245 | 0.245 | 0.245 |
| 50 | Bes | ~~ | Mah | 0.280 | 0.035 | 8.085  | 0.000 | 0.212  | 0.348 | 0.419 | 0.419 | 0.419 |
| 51 | Bes | ~~ | Aob | 0.273 | 0.041 | 6.721  | 0.000 | 0.193  | 0.353 | 0.382 | 0.382 | 0.382 |
| 52 | Bes | ~~ | Nr  | 0.177 | 0.035 | 5.126  | 0.000 | 0.110  | 0.245 | 0.271 | 0.271 | 0.271 |
| 53 | Mah | ~~ | Aob | 0.378 | 0.044 | 8.639  | 0.000 | 0.293  | 0.464 | 0.549 | 0.549 | 0.549 |
| 54 | Mah | ~~ | Nr  | 0.257 | 0.034 | 7.472  | 0.000 | 0.189  | 0.324 | 0.407 | 0.407 | 0.407 |
| 55 | Aob | ~~ | Nr  | 0.315 | 0.043 | 7.352  | 0.000 | 0.231  | 0.398 | 0.466 | 0.466 | 0.466 |

Model 1: Basic Stage Model

|    | lhs         | op | rhs         | est   | se    | z      | pvalue | ci.lower | ci.upper | std.lv | std.all | std.nox |
|----|-------------|----|-------------|-------|-------|--------|--------|----------|----------|--------|---------|---------|
| 1  | ZielInt     | == | ZielInt_1.z | 1.000 | 0.000 | NA     | NA     | 1.000    | 1.000    | 1.081  | 0.934   | 0.934   |
| 2  | ZielInt     | == | ZielInt_2.z | 0.999 | 0.022 | 45.248 | 0.000  | 0.956    | 1.043    | 1.080  | 0.928   | 0.928   |
| 3  | VhInt       | == | VHInt_1.z   | 1.000 | 0.000 | NA     | NA     | 1.000    | 1.000    | 1.198  | 0.939   | 0.939   |
| 4  | VhInt       | == | VHInt_2.z   | 0.951 | 0.022 | 43.735 | 0.000  | 0.908    | 0.993    | 1.139  | 0.915   | 0.915   |
| 5  | ImpInt      | == | ImpInt_1.z  | 1.000 | 0.000 | NA     | NA     | 1.000    | 1.000    | 1.209  | 0.799   | 0.799   |
| 6  | ImpInt      | == | ImpInt_2.z  | 0.865 | 0.041 | 20.979 | 0.000  | 0.785    | 0.946    | 1.046  | 0.761   | 0.761   |
| 7  | PNorm       | == | PNorm_1.z   | 1.000 | 0.000 | NA     | NA     | 1.000    | 1.000    | 1.175  | 0.884   | 0.884   |
| 8  | PNorm       | == | PNorm_2.z   | 1.008 | 0.026 | 38.304 | 0.000  | 0.956    | 1.059    | 1.184  | 0.918   | 0.918   |
| 9  | SNorm       | == | SNorm_1.z   | 1.000 | 0.000 | NA     | NA     | 1.000    | 1.000    | 0.802  | 0.692   | 0.692   |
| 10 | SNorm       | == | SNorm_2.z   | 1.371 | 0.121 | 11.362 | 0.000  | 1.135    | 1.608    | 1.099  | 0.954   | 0.954   |
| 11 | Einst       | == | Einst_1.z   | 1.000 | 0.000 | NA     | NA     | 1.000    | 1.000    | 0.896  | 0.873   | 0.873   |
| 12 | Einst       | == | Einst_2U.z  | 0.841 | 0.062 | 13.603 | 0.000  | 0.720    | 0.963    | 0.754  | 0.693   | 0.693   |
| 13 | WVK         | == | WVK_1U.z    | 1.000 | 0.000 | NA     | NA     | 1.000    | 1.000    | 0.703  | 0.694   | 0.694   |
| 14 | WVK         | == | WVK_2U.z    | 1.326 | 0.153 | 8.686  | 0.000  | 1.027    | 1.625    | 0.932  | 0.911   | 0.911   |
| 15 | Verh.z      | ~  | ImpInt      | 0.502 | 0.031 | 16.003 | 0.000  | 0.440    | 0.563    | 0.606  | 0.694   | 0.694   |
| 16 | ImpInt      | ~  | VhInt       | 0.806 | 0.038 | 21.049 | 0.000  | 0.731    | 0.881    | 0.799  | 0.799   | 0.799   |
| 17 | ImpInt      | ~  | WVK         | 0.183 | 0.069 | 2.654  | 0.008  | 0.048    | 0.319    | 0.107  | 0.107   | 0.107   |
| 18 | VhInt       | ~  | ZielInt     | 0.758 | 0.071 | 10.739 | 0.000  | 0.620    | 0.896    | 0.684  | 0.684   | 0.684   |
| 19 | VhInt       | ~  | WVK         | 0.237 | 0.055 | 4.340  | 0.000  | 0.130    | 0.344    | 0.139  | 0.139   | 0.139   |
| 20 | VhInt       | ~  | PNorm       | 0.166 | 0.069 | 2.387  | 0.017  | 0.030    | 0.302    | 0.162  | 0.162   | 0.162   |
| 21 | ZielInt     | ~  | PNorm       | 0.474 | 0.067 | 7.024  | 0.000  | 0.342    | 0.606    | 0.515  | 0.515   | 0.515   |
| 22 | ZielInt     | ~  | Einst       | 0.491 | 0.093 | 5.287  | 0.000  | 0.309    | 0.673    | 0.407  | 0.407   | 0.407   |
| 23 | PNorm       | ~  | SNorm       | 0.708 | 0.068 | 10.362 | 0.000  | 0.574    | 0.842    | 0.483  | 0.483   | 0.483   |
| 24 | Einst       | ~~ | WVK         | 0.165 | 0.039 | 4.190  | 0.000  | 0.088    | 0.243    | 0.262  | 0.262   | 0.262   |
| 25 | PNorm       | ~~ | Einst       | 0.591 | 0.060 | 9.848  | 0.000  | 0.474    | 0.709    | 0.641  | 0.641   | 0.641   |
| 26 | SNorm       | ~~ | Einst       | 0.341 | 0.048 | 7.111  | 0.000  | 0.247    | 0.435    | 0.475  | 0.475   | 0.475   |
| 27 | PNorm       | ~~ | WVK         | 0.169 | 0.042 | 4.068  | 0.000  | 0.088    | 0.251    | 0.234  | 0.234   | 0.234   |
| 28 | SNorm       | ~~ | WVK         | 0.125 | 0.033 | 3.846  | 0.000  | 0.061    | 0.189    | 0.222  | 0.222   | 0.222   |
| 29 | ZielInt_1.z | ~~ | ZielInt_1.z | 0.172 | 0.022 | 7.690  | 0.000  | 0.128    | 0.215    | 0.172  | 0.128   | 0.128   |
| 30 | ZielInt_2.z | ~~ | ZielInt_2.z | 0.188 | 0.035 | 5.369  | 0.000  | 0.119    | 0.256    | 0.188  | 0.139   | 0.139   |
| 31 | VHInt_1.z   | ~~ | VHInt_1.z   | 0.193 | 0.030 | 6.381  | 0.000  | 0.134    | 0.252    | 0.193  | 0.118   | 0.118   |
| 32 | VHInt_2.z   | ~~ | VHInt_2.z   | 0.252 | 0.034 | 7.511  | 0.000  | 0.186    | 0.318    | 0.252  | 0.163   | 0.163   |
| 33 | ImpInt_1.z  | ~~ | ImpInt_1.z  | 0.825 | 0.069 | 12.024 | 0.000  | 0.691    | 0.960    | 0.825  | 0.361   | 0.361   |
| 34 | ImpInt_2.z  | ~~ | ImpInt_2.z  | 0.794 | 0.083 | 9.506  | 0.000  | 0.630    | 0.957    | 0.794  | 0.420   | 0.420   |
| 35 | PNorm_1.z   | ~~ | PNorm_1.z   | 0.384 | 0.048 | 7.991  | 0.000  | 0.290    | 0.479    | 0.384  | 0.218   | 0.218   |
| 36 | PNorm_2.z   | ~~ | PNorm_2.z   | 0.261 | 0.036 | 7.239  | 0.000  | 0.190    | 0.331    | 0.261  | 0.157   | 0.157   |
| 37 | SNorm_1.z   | ~~ | SNorm_1.z   | 0.700 | 0.064 | 10.965 | 0.000  | 0.575    | 0.825    | 0.700  | 0.521   | 0.521   |
| 38 | SNorm_2.z   | ~~ | SNorm_2.z   | 0.118 | 0.109 | 1.086  | 0.278  | -0.095   | 0.332    | 0.118  | 0.089   | 0.089   |
| 39 | Einst_1.z   | ~~ | Einst_1.z   | 0.250 | 0.041 | 6.045  | 0.000  | 0.169    | 0.331    | 0.250  | 0.238   | 0.238   |
| 40 | Einst_2U.z  | ~~ | Einst_2U.z  | 0.614 | 0.065 | 9.390  | 0.000  | 0.486    | 0.742    | 0.614  | 0.520   | 0.520   |
| 41 | WVK_1U.z    | ~~ | WVK_1U.z    | 0.533 | 0.071 | 7.532  | 0.000  | 0.395    | 0.672    | 0.533  | 0.519   | 0.519   |
| 42 | WVK_2U.z    | ~~ | WVK_2U.z    | 0.178 | 0.089 | 1.986  | 0.047  | 0.002    | 0.353    | 0.178  | 0.170   | 0.170   |
| 43 | Verh.z      | ~~ | Verh.z      | 0.396 | 0.030 | 13.057 | 0.000  | 0.337    | 0.456    | 0.396  | 0.519   | 0.519   |
| 44 | ZielInt     | ~~ | ZielInt     | 0.278 | 0.032 | 8.653  | 0.000  | 0.215    | 0.340    | 0.238  | 0.238   | 0.238   |
| 45 | VhInt       | ~~ | VhInt       | 0.339 | 0.036 | 9.343  | 0.000  | 0.268    | 0.410    | 0.236  | 0.236   | 0.236   |

|    |        |    |        |       |       |        |       |       |       |       |       |       |
|----|--------|----|--------|-------|-------|--------|-------|-------|-------|-------|-------|-------|
| 46 | ImpInt | ~~ | ImpInt | 0.419 | 0.052 | 8.050  | 0.000 | 0.317 | 0.521 | 0.287 | 0.287 | 0.287 |
| 47 | PNorm  | ~~ | PNorm  | 1.059 | 0.076 | 13.994 | 0.000 | 0.911 | 1.208 | 0.767 | 0.767 | 0.767 |
| 48 | SNorm  | ~~ | SNorm  | 0.643 | 0.078 | 8.253  | 0.000 | 0.490 | 0.795 | 1.000 | 1.000 | 1.000 |
| 49 | Einst  | ~~ | Einst  | 0.802 | 0.080 | 10.055 | 0.000 | 0.646 | 0.959 | 1.000 | 1.000 | 1.000 |
| 50 | WVK    | ~~ | WVK    | 0.495 | 0.077 | 6.410  | 0.000 | 0.343 | 0.646 | 1.000 | 1.000 | 1.000 |

Model 2: Reduced stage model with mindfulness facets as predictors of intentions and behavior

|    | lhs     | op | rhs           | est    | se    | z      | pvalue | ci.lower | ci.upper | std.lv | std.all | std.nox |
|----|---------|----|---------------|--------|-------|--------|--------|----------|----------|--------|---------|---------|
| 1  | ZielInt | == | ZielInt_1.z   | 1.000  | 0.000 | NA     | NA     | 1.000    | 1.000    | 1.070  | 0.924   | 0.924   |
| 2  | ZielInt | == | ZielInt_2.z   | 1.018  | 0.025 | 40.063 | 0.000  | 0.969    | 1.068    | 1.090  | 0.936   | 0.936   |
| 3  | VhInt   | == | VHInt_1.z     | 1.000  | 0.000 | NA     | NA     | 1.000    | 1.000    | 1.203  | 0.940   | 0.940   |
| 4  | VhInt   | == | VHInt_2.z     | 0.950  | 0.022 | 42.688 | 0.000  | 0.906    | 0.994    | 1.143  | 0.915   | 0.915   |
| 5  | ImpInt  | == | ImpInt_1.z    | 1.000  | 0.000 | NA     | NA     | 1.000    | 1.000    | 1.218  | 0.803   | 0.803   |
| 6  | ImpInt  | == | ImpInt_2.z    | 0.869  | 0.040 | 21.526 | 0.000  | 0.790    | 0.949    | 1.059  | 0.769   | 0.769   |
| 7  | Beo     | == | FFMQ_1beo.z   | 1.000  | 0.000 | NA     | NA     | 1.000    | 1.000    | 0.589  | 0.568   | 0.568   |
| 8  | Beo     | == | FFMQ_15beo.z  | 1.226  | 0.114 | 10.801 | 0.000  | 1.004    | 1.449    | 0.723  | 0.713   | 0.713   |
| 9  | Beo     | == | FFMQ_26beo.z  | 0.944  | 0.108 | 8.727  | 0.000  | 0.732    | 1.156    | 0.557  | 0.566   | 0.566   |
| 10 | Beo     | == | FFMQ_31beo.z  | 1.230  | 0.119 | 10.368 | 0.000  | 0.998    | 1.463    | 0.725  | 0.666   | 0.666   |
| 11 | Bes     | == | FFMQ_2bes.z   | 1.000  | 0.000 | NA     | NA     | 1.000    | 1.000    | 0.832  | 0.812   | 0.812   |
| 12 | Bes     | == | FFMQ_12besU.z | 0.964  | 0.047 | 20.598 | 0.000  | 0.872    | 1.056    | 0.802  | 0.801   | 0.801   |
| 13 | Bes     | == | FFMQ_16besU.z | 1.095  | 0.045 | 24.558 | 0.000  | 1.008    | 1.183    | 0.911  | 0.903   | 0.903   |
| 14 | Bes     | == | FFMQ_37bes.z  | 0.832  | 0.044 | 18.976 | 0.000  | 0.746    | 0.918    | 0.692  | 0.712   | 0.712   |
| 15 | Mah     | == | FFMQ_5mahU.z  | 1.000  | 0.000 | NA     | NA     | 1.000    | 1.000    | 0.803  | 0.835   | 0.835   |
| 16 | Mah     | == | FFMQ_8mahU.z  | 0.910  | 0.050 | 18.086 | 0.000  | 0.811    | 1.008    | 0.730  | 0.705   | 0.705   |
| 17 | Mah     | == | FFMQ_13mahU.z | 1.092  | 0.045 | 24.510 | 0.000  | 1.004    | 1.179    | 0.876  | 0.864   | 0.864   |
| 18 | Mah     | == | FFMQ_18mahU.z | 0.975  | 0.050 | 19.556 | 0.000  | 0.877    | 1.072    | 0.782  | 0.779   | 0.779   |
| 19 | Aob     | == | FFMQ_14aobU.z | 1.000  | 0.000 | NA     | NA     | 1.000    | 1.000    | 0.858  | 0.724   | 0.724   |
| 20 | Aob     | == | FFMQ_17aobU.z | 0.740  | 0.062 | 12.014 | 0.000  | 0.619    | 0.861    | 0.635  | 0.552   | 0.552   |
| 21 | Aob     | == | FFMQ_25aobU.z | 0.832  | 0.055 | 15.048 | 0.000  | 0.724    | 0.941    | 0.714  | 0.693   | 0.693   |
| 22 | Aob     | == | FFMQ_30aobU.z | 1.123  | 0.061 | 18.329 | 0.000  | 1.003    | 1.243    | 0.964  | 0.866   | 0.866   |
| 23 | Nr      | == | FFMQ_19nr.z   | 1.000  | 0.000 | NA     | NA     | 1.000    | 1.000    | 0.783  | 0.780   | 0.780   |
| 24 | Nr      | == | FFMQ_24nr.z   | 0.871  | 0.053 | 16.491 | 0.000  | 0.767    | 0.974    | 0.682  | 0.746   | 0.746   |
| 25 | Nr      | == | FFMQ_29nr.z   | 0.726  | 0.058 | 12.534 | 0.000  | 0.613    | 0.840    | 0.569  | 0.608   | 0.608   |
| 26 | Nr      | == | FFMQ_33nr.z   | 0.885  | 0.059 | 15.109 | 0.000  | 0.770    | 1.000    | 0.693  | 0.740   | 0.740   |
| 27 | Verh.z  | ~  | Beo           | 0.074  | 0.072 | 1.025  | 0.305  | -0.068   | 0.216    | 0.044  | 0.050   | 0.050   |
| 28 | Verh.z  | ~  | Bes           | -0.029 | 0.046 | -0.633 | 0.527  | -0.120   | 0.061    | -0.024 | -0.028  | -0.028  |
| 29 | Verh.z  | ~  | Mah           | 0.005  | 0.059 | 0.089  | 0.929  | -0.110   | 0.121    | 0.004  | 0.005   | 0.005   |
| 30 | Verh.z  | ~  | Aob           | 0.027  | 0.061 | 0.439  | 0.661  | -0.093   | 0.146    | 0.023  | 0.026   | 0.026   |
| 31 | Verh.z  | ~  | Nr            | -0.102 | 0.059 | -1.725 | 0.084  | -0.219   | 0.014    | -0.080 | -0.092  | -0.092  |
| 32 | ImpInt  | ~  | Beo           | 0.053  | 0.099 | 0.531  | 0.595  | -0.142   | 0.247    | 0.025  | 0.025   | 0.025   |
| 33 | ImpInt  | ~  | Bes           | 0.115  | 0.065 | 1.757  | 0.079  | -0.013   | 0.242    | 0.078  | 0.078   | 0.078   |
| 34 | ImpInt  | ~  | Mah           | 0.002  | 0.083 | 0.029  | 0.977  | -0.160   | 0.165    | 0.002  | 0.002   | 0.002   |
| 35 | ImpInt  | ~  | Aob           | -0.064 | 0.086 | -0.744 | 0.457  | -0.232   | 0.105    | -0.045 | -0.045  | -0.045  |
| 36 | ImpInt  | ~  | Nr            | 0.158  | 0.080 | 1.965  | 0.049  | 0.000    | 0.315    | 0.102  | 0.102   | 0.102   |
| 37 | VhInt   | ~  | Beo           | 0.017  | 0.073 | 0.236  | 0.814  | -0.126   | 0.161    | 0.008  | 0.008   | 0.008   |
| 38 | VhInt   | ~  | Bes           | 0.048  | 0.055 | 0.884  | 0.377  | -0.059   | 0.155    | 0.033  | 0.033   | 0.033   |
| 39 | VhInt   | ~  | Mah           | -0.006 | 0.056 | -0.112 | 0.911  | -0.115   | 0.103    | -0.004 | -0.004  | -0.004  |
| 40 | VhInt   | ~  | Aob           | -0.017 | 0.060 | -0.276 | 0.783  | -0.135   | 0.101    | -0.012 | -0.012  | -0.012  |
| 41 | VhInt   | ~  | Nr            | 0.108  | 0.055 | 1.978  | 0.048  | 0.001    | 0.216    | 0.070  | 0.070   | 0.070   |
| 42 | ZielInt | ~  | Beo           | 0.576  | 0.106 | 5.419  | 0.000  | 0.367    | 0.784    | 0.317  | 0.317   | 0.317   |
| 43 | ZielInt | ~  | Bes           | -0.153 | 0.067 | -2.263 | 0.024  | -0.285   | -0.020   | -0.119 | -0.119  | -0.119  |
| 44 | ZielInt | ~  | Mah           | -0.101 | 0.084 | -1.198 | 0.231  | -0.266   | 0.064    | -0.076 | -0.076  | -0.076  |
| 45 | ZielInt | ~  | Aob           | 0.115  | 0.080 | 1.428  | 0.153  | -0.043   | 0.272    | 0.092  | 0.092   | 0.092   |

|    |               |    |               |       |       |        |       |        |       |       |       |       |
|----|---------------|----|---------------|-------|-------|--------|-------|--------|-------|-------|-------|-------|
| 46 | ZielInt       | ~  | Nr            | 0.016 | 0.081 | 0.203  | 0.839 | -0.142 | 0.175 | 0.012 | 0.012 | 0.012 |
| 47 | Verh.z        | ~  | ImpInt        | 0.498 | 0.033 | 14.933 | 0.000 | 0.433  | 0.564 | 0.607 | 0.693 | 0.693 |
| 48 | ImpInt        | ~  | VhInt         | 0.824 | 0.037 | 22.147 | 0.000 | 0.751  | 0.897 | 0.814 | 0.814 | 0.814 |
| 49 | VhInt         | ~  | ZielInt       | 0.963 | 0.033 | 29.046 | 0.000 | 0.898  | 1.029 | 0.857 | 0.857 | 0.857 |
| 50 | ZielInt_1.z   | ~~ | ZielInt_1.z   | 0.195 | 0.028 | 6.908  | 0.000 | 0.140  | 0.250 | 0.195 | 0.146 | 0.146 |
| 51 | ZielInt_2.z   | ~~ | ZielInt_2.z   | 0.167 | 0.035 | 4.814  | 0.000 | 0.099  | 0.235 | 0.167 | 0.123 | 0.123 |
| 52 | VHInt_1.z     | ~~ | VHInt_1.z     | 0.191 | 0.031 | 6.143  | 0.000 | 0.130  | 0.251 | 0.191 | 0.116 | 0.116 |
| 53 | VHInt_2.z     | ~~ | VHInt_2.z     | 0.252 | 0.035 | 7.205  | 0.000 | 0.184  | 0.321 | 0.252 | 0.162 | 0.162 |
| 54 | ImpInt_1.z    | ~~ | ImpInt_1.z    | 0.815 | 0.070 | 11.626 | 0.000 | 0.678  | 0.953 | 0.815 | 0.355 | 0.355 |
| 55 | ImpInt_2.z    | ~~ | ImpInt_2.z    | 0.776 | 0.082 | 9.412  | 0.000 | 0.614  | 0.937 | 0.776 | 0.409 | 0.409 |
| 56 | FFMQ_1beo.z   | ~~ | FFMQ_1beo.z   | 0.731 | 0.052 | 13.962 | 0.000 | 0.628  | 0.834 | 0.731 | 0.678 | 0.678 |
| 57 | FFMQ_15beo.z  | ~~ | FFMQ_15beo.z  | 0.506 | 0.056 | 9.015  | 0.000 | 0.396  | 0.616 | 0.506 | 0.492 | 0.492 |
| 58 | FFMQ_26beo.z  | ~~ | FFMQ_26beo.z  | 0.656 | 0.067 | 9.854  | 0.000 | 0.526  | 0.787 | 0.656 | 0.679 | 0.679 |
| 59 | FFMQ_31beo.z  | ~~ | FFMQ_31beo.z  | 0.661 | 0.061 | 10.812 | 0.000 | 0.541  | 0.780 | 0.661 | 0.557 | 0.557 |
| 60 | FFMQ_2bes.z   | ~~ | FFMQ_2bes.z   | 0.357 | 0.040 | 8.825  | 0.000 | 0.278  | 0.437 | 0.357 | 0.341 | 0.341 |
| 61 | FFMQ_12besU.z | ~~ | FFMQ_12besU.z | 0.359 | 0.036 | 9.983  | 0.000 | 0.289  | 0.430 | 0.359 | 0.359 | 0.359 |
| 62 | FFMQ_16besU.z | ~~ | FFMQ_16besU.z | 0.189 | 0.031 | 6.112  | 0.000 | 0.128  | 0.249 | 0.189 | 0.185 | 0.185 |
| 63 | FFMQ_37bes.z  | ~~ | FFMQ_37bes.z  | 0.465 | 0.041 | 11.418 | 0.000 | 0.385  | 0.545 | 0.465 | 0.493 | 0.493 |
| 64 | FFMQ_5mahU.z  | ~~ | FFMQ_5mahU.z  | 0.280 | 0.026 | 10.698 | 0.000 | 0.228  | 0.331 | 0.280 | 0.303 | 0.303 |
| 65 | FFMQ_8mahU.z  | ~~ | FFMQ_8mahU.z  | 0.540 | 0.040 | 13.337 | 0.000 | 0.461  | 0.619 | 0.540 | 0.503 | 0.503 |
| 66 | FFMQ_13mahU.z | ~~ | FFMQ_13mahU.z | 0.261 | 0.030 | 8.604  | 0.000 | 0.201  | 0.320 | 0.261 | 0.254 | 0.254 |
| 67 | FFMQ_18mahU.z | ~~ | FFMQ_18mahU.z | 0.396 | 0.033 | 11.989 | 0.000 | 0.331  | 0.461 | 0.396 | 0.393 | 0.393 |
| 68 | FFMQ_14aobU.z | ~~ | FFMQ_14aobU.z | 0.669 | 0.058 | 11.565 | 0.000 | 0.555  | 0.782 | 0.669 | 0.476 | 0.476 |
| 69 | FFMQ_17aobU.z | ~~ | FFMQ_17aobU.z | 0.920 | 0.056 | 16.484 | 0.000 | 0.810  | 1.029 | 0.920 | 0.695 | 0.695 |
| 70 | FFMQ_25aobU.z | ~~ | FFMQ_25aobU.z | 0.552 | 0.044 | 12.594 | 0.000 | 0.466  | 0.638 | 0.552 | 0.519 | 0.519 |
| 71 | FFMQ_30aobU.z | ~~ | FFMQ_30aobU.z | 0.309 | 0.040 | 7.681  | 0.000 | 0.230  | 0.388 | 0.309 | 0.250 | 0.250 |
| 72 | FFMQ_19nr.z   | ~~ | FFMQ_19nr.z   | 0.394 | 0.049 | 8.108  | 0.000 | 0.299  | 0.489 | 0.394 | 0.391 | 0.391 |
| 73 | FFMQ_24nr.z   | ~~ | FFMQ_24nr.z   | 0.370 | 0.035 | 10.607 | 0.000 | 0.302  | 0.439 | 0.370 | 0.443 | 0.443 |
| 74 | FFMQ_29nr.z   | ~~ | FFMQ_29nr.z   | 0.553 | 0.042 | 13.013 | 0.000 | 0.469  | 0.636 | 0.553 | 0.631 | 0.631 |
| 75 | FFMQ_33nr.z   | ~~ | FFMQ_33nr.z   | 0.398 | 0.044 | 9.014  | 0.000 | 0.312  | 0.485 | 0.398 | 0.453 | 0.453 |
| 76 | Verh.z        | ~~ | Verh.z        | 0.399 | 0.030 | 13.121 | 0.000 | 0.339  | 0.458 | 0.399 | 0.520 | 0.520 |
| 77 | ZielInt       | ~~ | ZielInt       | 1.032 | 0.075 | 13.774 | 0.000 | 0.885  | 1.178 | 0.901 | 0.901 | 0.901 |
| 78 | VhInt         | ~~ | VhInt         | 0.360 | 0.040 | 9.109  | 0.000 | 0.283  | 0.437 | 0.249 | 0.249 | 0.249 |
| 79 | ImpInt        | ~~ | ImpInt        | 0.425 | 0.055 | 7.737  | 0.000 | 0.317  | 0.533 | 0.287 | 0.287 | 0.287 |
| 80 | Beo           | ~~ | Beo           | 0.347 | 0.054 | 6.468  | 0.000 | 0.242  | 0.453 | 1.000 | 1.000 | 1.000 |
| 81 | Bes           | ~~ | Bes           | 0.692 | 0.058 | 11.896 | 0.000 | 0.578  | 0.805 | 1.000 | 1.000 | 1.000 |
| 82 | Mah           | ~~ | Mah           | 0.644 | 0.049 | 13.151 | 0.000 | 0.548  | 0.740 | 1.000 | 1.000 | 1.000 |
| 83 | Aob           | ~~ | Aob           | 0.737 | 0.077 | 9.532  | 0.000 | 0.585  | 0.888 | 1.000 | 1.000 | 1.000 |
| 84 | Nr            | ~~ | Nr            | 0.614 | 0.060 | 10.197 | 0.000 | 0.496  | 0.731 | 1.000 | 1.000 | 1.000 |
| 85 | Beo           | ~~ | Bes           | 0.128 | 0.032 | 4.046  | 0.000 | 0.066  | 0.190 | 0.261 | 0.261 | 0.261 |
| 86 | Beo           | ~~ | Mah           | 0.084 | 0.029 | 2.934  | 0.003 | 0.028  | 0.140 | 0.178 | 0.178 | 0.178 |
| 87 | Beo           | ~~ | Aob           | 0.042 | 0.029 | 1.467  | 0.142 | -0.014 | 0.099 | 0.084 | 0.084 | 0.084 |
| 88 | Beo           | ~~ | Nr            | 0.113 | 0.030 | 3.761  | 0.000 | 0.054  | 0.172 | 0.245 | 0.245 | 0.245 |
| 89 | Bes           | ~~ | Mah           | 0.280 | 0.035 | 8.080  | 0.000 | 0.212  | 0.348 | 0.420 | 0.420 | 0.420 |
| 90 | Bes           | ~~ | Aob           | 0.273 | 0.041 | 6.719  | 0.000 | 0.193  | 0.353 | 0.382 | 0.382 | 0.382 |
| 91 | Bes           | ~~ | Nr            | 0.177 | 0.035 | 5.127  | 0.000 | 0.109  | 0.245 | 0.272 | 0.272 | 0.272 |
| 92 | Mah           | ~~ | Aob           | 0.378 | 0.044 | 8.634  | 0.000 | 0.292  | 0.464 | 0.549 | 0.549 | 0.549 |
| 93 | Mah           | ~~ | Nr            | 0.256 | 0.034 | 7.465  | 0.000 | 0.189  | 0.323 | 0.407 | 0.407 | 0.407 |

94

Aob ~~

Nr 0.314 0.043 7.338 0.000 0.230 0.397 0.466 0.466 0.466

Model 3: Extended stage model with mindfulness facets as predictors of intentions and behavior

|    | lhs     | op | rhs           | est    | se    | z      | pvalue | ci.lower | ci.upper | std.lv | std.all | std.noxx |
|----|---------|----|---------------|--------|-------|--------|--------|----------|----------|--------|---------|----------|
| 1  | ZielInt | == | ZielInt_1.z   | 1.000  | 0.000 | NA     | NA     | 1.000    | 1.000    | 1.072  | 0.932   | 0.932    |
| 2  | ZielInt | == | ZielInt_2.z   | 1.001  | 0.023 | 44.221 | 0.000  | 0.956    | 1.045    | 1.072  | 0.928   | 0.928    |
| 3  | VhInt   | == | VHInt_1.z     | 1.000  | 0.000 | NA     | NA     | 1.000    | 1.000    | 1.191  | 0.938   | 0.938    |
| 4  | VhInt   | == | VHInt_2.z     | 0.950  | 0.022 | 43.254 | 0.000  | 0.907    | 0.993    | 1.131  | 0.914   | 0.914    |
| 5  | ImpInt  | == | ImpInt_1.z    | 1.000  | 0.000 | NA     | NA     | 1.000    | 1.000    | 1.195  | 0.795   | 0.795    |
| 6  | ImpInt  | == | ImpInt_2.z    | 0.867  | 0.042 | 20.833 | 0.000  | 0.785    | 0.948    | 1.036  | 0.758   | 0.758    |
| 7  | PNorm   | == | PNorm_1.z     | 1.000  | 0.000 | NA     | NA     | 1.000    | 1.000    | 1.174  | 0.884   | 0.884    |
| 8  | PNorm   | == | PNorm_2.z     | 1.010  | 0.026 | 38.350 | 0.000  | 0.959    | 1.062    | 1.186  | 0.920   | 0.920    |
| 9  | SNorm   | == | SNorm_1.z     | 1.000  | 0.000 | NA     | NA     | 1.000    | 1.000    | 0.811  | 0.700   | 0.700    |
| 10 | SNorm   | == | SNorm_2.z     | 1.336  | 0.114 | 11.760 | 0.000  | 1.113    | 1.559    | 1.084  | 0.941   | 0.941    |
| 11 | Einst   | == | Einst_1.z     | 1.000  | 0.000 | NA     | NA     | 1.000    | 1.000    | 0.886  | 0.864   | 0.864    |
| 12 | Einst   | == | Einst_2U.z    | 0.856  | 0.061 | 13.954 | 0.000  | 0.736    | 0.977    | 0.758  | 0.698   | 0.698    |
| 13 | WVK     | == | WVK_1U.z      | 1.000  | 0.000 | NA     | NA     | 1.000    | 1.000    | 0.719  | 0.710   | 0.710    |
| 14 | WVK     | == | WVK_2U.z      | 1.264  | 0.139 | 9.098  | 0.000  | 0.992    | 1.537    | 0.909  | 0.890   | 0.890    |
| 15 | Beo     | == | FFMQ_1beo.z   | 1.000  | 0.000 | NA     | NA     | 1.000    | 1.000    | 0.596  | 0.574   | 0.574    |
| 16 | Beo     | == | FFMQ_15beo.z  | 1.201  | 0.112 | 10.683 | 0.000  | 0.981    | 1.422    | 0.716  | 0.706   | 0.706    |
| 17 | Beo     | == | FFMQ_26beo.z  | 0.931  | 0.108 | 8.586  | 0.000  | 0.718    | 1.143    | 0.555  | 0.564   | 0.564    |
| 18 | Beo     | == | FFMQ_31beo.z  | 1.222  | 0.118 | 10.315 | 0.000  | 0.990    | 1.454    | 0.729  | 0.669   | 0.669    |
| 19 | Bes     | == | FFMQ_2bes.z   | 1.000  | 0.000 | NA     | NA     | 1.000    | 1.000    | 0.831  | 0.812   | 0.812    |
| 20 | Bes     | == | FFMQ_12besU.z | 0.965  | 0.047 | 20.573 | 0.000  | 0.873    | 1.057    | 0.802  | 0.801   | 0.801    |
| 21 | Bes     | == | FFMQ_16besU.z | 1.096  | 0.045 | 24.490 | 0.000  | 1.009    | 1.184    | 0.911  | 0.903   | 0.903    |
| 22 | Bes     | == | FFMQ_37bes.z  | 0.832  | 0.044 | 18.951 | 0.000  | 0.746    | 0.918    | 0.691  | 0.712   | 0.712    |
| 23 | Mah     | == | FFMQ_5mahU.z  | 1.000  | 0.000 | NA     | NA     | 1.000    | 1.000    | 0.802  | 0.835   | 0.835    |
| 24 | Mah     | == | FFMQ_8mahU.z  | 0.910  | 0.050 | 18.074 | 0.000  | 0.811    | 1.009    | 0.730  | 0.705   | 0.705    |
| 25 | Mah     | == | FFMQ_13mahU.z | 1.092  | 0.045 | 24.439 | 0.000  | 1.005    | 1.180    | 0.876  | 0.864   | 0.864    |
| 26 | Mah     | == | FFMQ_18mahU.z | 0.976  | 0.050 | 19.548 | 0.000  | 0.878    | 1.074    | 0.783  | 0.780   | 0.780    |
| 27 | Aob     | == | FFMQ_14aobU.z | 1.000  | 0.000 | NA     | NA     | 1.000    | 1.000    | 0.859  | 0.725   | 0.725    |
| 28 | Aob     | == | FFMQ_17aobU.z | 0.739  | 0.061 | 12.027 | 0.000  | 0.619    | 0.860    | 0.635  | 0.552   | 0.552    |
| 29 | Aob     | == | FFMQ_25aobU.z | 0.832  | 0.055 | 15.129 | 0.000  | 0.724    | 0.940    | 0.715  | 0.694   | 0.694    |
| 30 | Aob     | == | FFMQ_30aobU.z | 1.121  | 0.060 | 18.564 | 0.000  | 1.003    | 1.239    | 0.963  | 0.865   | 0.865    |
| 31 | Nr      | == | FFMQ_19nr.z   | 1.000  | 0.000 | NA     | NA     | 1.000    | 1.000    | 0.777  | 0.774   | 0.774    |
| 32 | Nr      | == | FFMQ_24nr.z   | 0.867  | 0.053 | 16.370 | 0.000  | 0.763    | 0.971    | 0.674  | 0.737   | 0.737    |
| 33 | Nr      | == | FFMQ_29nr.z   | 0.742  | 0.058 | 12.702 | 0.000  | 0.627    | 0.856    | 0.576  | 0.616   | 0.616    |
| 34 | Nr      | == | FFMQ_33nr.z   | 0.905  | 0.058 | 15.490 | 0.000  | 0.791    | 1.020    | 0.703  | 0.750   | 0.750    |
| 35 | Verh.z  | ~  | ImpInt        | 0.509  | 0.032 | 15.692 | 0.000  | 0.445    | 0.572    | 0.608  | 0.700   | 0.700    |
| 36 | Verh.z  | ~  | Beo           | 0.055  | 0.068 | 0.815  | 0.415  | -0.077   | 0.187    | 0.033  | 0.038   | 0.038    |
| 37 | Verh.z  | ~  | Bes           | -0.028 | 0.047 | -0.607 | 0.544  | -0.120   | 0.063    | -0.024 | -0.027  | -0.027   |
| 38 | Verh.z  | ~  | Mah           | 0.006  | 0.059 | 0.108  | 0.914  | -0.110   | 0.123    | 0.005  | 0.006   | 0.006    |
| 39 | Verh.z  | ~  | Aob           | 0.019  | 0.062 | 0.313  | 0.754  | -0.102   | 0.141    | 0.017  | 0.019   | 0.019    |
| 40 | Verh.z  | ~  | Nr            | -0.093 | 0.060 | -1.543 | 0.123  | -0.211   | 0.025    | -0.072 | -0.083  | -0.083   |
| 41 | ImpInt  | ~  | VhInt         | 0.788  | 0.038 | 20.476 | 0.000  | 0.713    | 0.864    | 0.785  | 0.785   | 0.785    |
| 42 | ImpInt  | ~  | WVK           | 0.168  | 0.069 | 2.441  | 0.015  | 0.033    | 0.304    | 0.101  | 0.101   | 0.101    |
| 43 | ImpInt  | ~  | Beo           | 0.060  | 0.093 | 0.645  | 0.519  | -0.123   | 0.243    | 0.030  | 0.030   | 0.030    |
| 44 | ImpInt  | ~  | Bes           | 0.110  | 0.064 | 1.721  | 0.085  | -0.015   | 0.236    | 0.077  | 0.077   | 0.077    |
| 45 | ImpInt  | ~  | Mah           | 0.001  | 0.083 | 0.018  | 0.986  | -0.161   | 0.164    | 0.001  | 0.001   | 0.001    |

|    |               |    |               |        |       |        |       |        |       |        |        |        |
|----|---------------|----|---------------|--------|-------|--------|-------|--------|-------|--------|--------|--------|
| 46 | ImpInt        | ~  | Aob           | -0.063 | 0.085 | -0.745 | 0.456 | -0.230 | 0.103 | -0.046 | -0.046 | -0.046 |
| 47 | ImpInt        | ~  | Nr            | 0.142  | 0.081 | 1.751  | 0.080 | -0.017 | 0.300 | 0.092  | 0.092  | 0.092  |
| 48 | VhInt         | ~  | ZielInt       | 0.761  | 0.070 | 10.847 | 0.000 | 0.623  | 0.898 | 0.685  | 0.685  | 0.685  |
| 49 | VhInt         | ~  | WVK           | 0.226  | 0.055 | 4.117  | 0.000 | 0.118  | 0.333 | 0.136  | 0.136  | 0.136  |
| 50 | VhInt         | ~  | PNorm         | 0.164  | 0.067 | 2.431  | 0.015 | 0.032  | 0.295 | 0.161  | 0.161  | 0.161  |
| 51 | VhInt         | ~  | Beo           | -0.009 | 0.063 | -0.144 | 0.886 | -0.133 | 0.115 | -0.005 | -0.005 | -0.005 |
| 52 | VhInt         | ~  | Bes           | 0.033  | 0.051 | 0.640  | 0.522 | -0.068 | 0.133 | 0.023  | 0.023  | 0.023  |
| 53 | VhInt         | ~  | Mah           | 0.009  | 0.053 | 0.163  | 0.870 | -0.095 | 0.112 | 0.006  | 0.006  | 0.006  |
| 54 | VhInt         | ~  | Aob           | -0.043 | 0.056 | -0.757 | 0.449 | -0.153 | 0.068 | -0.031 | -0.031 | -0.031 |
| 55 | VhInt         | ~  | Nr            | 0.107  | 0.052 | 2.078  | 0.038 | 0.006  | 0.208 | 0.070  | 0.070  | 0.070  |
| 56 | ZielInt       | ~  | PNorm         | 0.429  | 0.071 | 6.069  | 0.000 | 0.290  | 0.567 | 0.470  | 0.470  | 0.470  |
| 57 | ZielInt       | ~  | Einst         | 0.546  | 0.101 | 5.426  | 0.000 | 0.349  | 0.743 | 0.451  | 0.451  | 0.451  |
| 58 | ZielInt       | ~  | Beo           | 0.086  | 0.064 | 1.335  | 0.182 | -0.040 | 0.211 | 0.048  | 0.048  | 0.048  |
| 59 | ZielInt       | ~  | Bes           | -0.078 | 0.043 | -1.809 | 0.070 | -0.163 | 0.007 | -0.061 | -0.061 | -0.061 |
| 60 | ZielInt       | ~  | Mah           | 0.000  | 0.045 | 0.002  | 0.998 | -0.089 | 0.089 | 0.000  | 0.000  | 0.000  |
| 61 | ZielInt       | ~  | Aob           | -0.050 | 0.048 | -1.037 | 0.300 | -0.144 | 0.044 | -0.040 | -0.040 | -0.040 |
| 62 | ZielInt       | ~  | Nr            | 0.118  | 0.053 | 2.221  | 0.026 | 0.014  | 0.223 | 0.086  | 0.086  | 0.086  |
| 63 | PNorm         | ~  | SNorm         | 0.710  | 0.068 | 10.391 | 0.000 | 0.576  | 0.844 | 0.491  | 0.491  | 0.491  |
| 64 | Einst         | ~~ | WVK           | 0.167  | 0.040 | 4.189  | 0.000 | 0.089  | 0.245 | 0.263  | 0.263  | 0.263  |
| 65 | PNorm         | ~~ | Einst         | 0.578  | 0.059 | 9.852  | 0.000 | 0.463  | 0.693 | 0.638  | 0.638  | 0.638  |
| 66 | SNorm         | ~~ | Einst         | 0.348  | 0.048 | 7.292  | 0.000 | 0.254  | 0.441 | 0.484  | 0.484  | 0.484  |
| 67 | PNorm         | ~~ | WVK           | 0.159  | 0.041 | 3.876  | 0.000 | 0.079  | 0.240 | 0.217  | 0.217  | 0.217  |
| 68 | SNorm         | ~~ | WVK           | 0.135  | 0.034 | 3.969  | 0.000 | 0.068  | 0.201 | 0.231  | 0.231  | 0.231  |
| 69 | ZielInt_1.z   | ~~ | ZielInt_1.z   | 0.173  | 0.023 | 7.637  | 0.000 | 0.129  | 0.218 | 0.173  | 0.131  | 0.131  |
| 70 | ZielInt_2.z   | ~~ | ZielInt_2.z   | 0.187  | 0.035 | 5.330  | 0.000 | 0.118  | 0.255 | 0.187  | 0.140  | 0.140  |
| 71 | VHInt_1.z     | ~~ | VHInt_1.z     | 0.192  | 0.030 | 6.450  | 0.000 | 0.134  | 0.251 | 0.192  | 0.119  | 0.119  |
| 72 | VHInt_2.z     | ~~ | VHInt_2.z     | 0.254  | 0.034 | 7.558  | 0.000 | 0.188  | 0.319 | 0.254  | 0.165  | 0.165  |
| 73 | ImpInt_1.z    | ~~ | ImpInt_1.z    | 0.830  | 0.069 | 11.975 | 0.000 | 0.694  | 0.966 | 0.830  | 0.367  | 0.367  |
| 74 | ImpInt_2.z    | ~~ | ImpInt_2.z    | 0.794  | 0.082 | 9.668  | 0.000 | 0.633  | 0.955 | 0.794  | 0.425  | 0.425  |
| 75 | PNorm_1.z     | ~~ | PNorm_1.z     | 0.387  | 0.048 | 8.012  | 0.000 | 0.293  | 0.482 | 0.387  | 0.219  | 0.219  |
| 76 | PNorm_2.z     | ~~ | PNorm_2.z     | 0.257  | 0.036 | 7.096  | 0.000 | 0.186  | 0.328 | 0.257  | 0.154  | 0.154  |
| 77 | SNorm_1.z     | ~~ | SNorm_1.z     | 0.685  | 0.064 | 10.642 | 0.000 | 0.559  | 0.811 | 0.685  | 0.510  | 0.510  |
| 78 | SNorm_2.z     | ~~ | SNorm_2.z     | 0.152  | 0.102 | 1.481  | 0.139 | -0.049 | 0.352 | 0.152  | 0.114  | 0.114  |
| 79 | Einst_1.z     | ~~ | Einst_1.z     | 0.265  | 0.040 | 6.595  | 0.000 | 0.187  | 0.344 | 0.265  | 0.253  | 0.253  |
| 80 | Einst_2U.z    | ~~ | Einst_2U.z    | 0.605  | 0.065 | 9.338  | 0.000 | 0.478  | 0.732 | 0.605  | 0.513  | 0.513  |
| 81 | WVK_1U.z      | ~~ | WVK_1U.z      | 0.509  | 0.070 | 7.247  | 0.000 | 0.372  | 0.647 | 0.509  | 0.497  | 0.497  |
| 82 | WVK_2U.z      | ~~ | WVK_2U.z      | 0.218  | 0.081 | 2.675  | 0.007 | 0.058  | 0.378 | 0.218  | 0.209  | 0.209  |
| 83 | FFMQ_1beo.z   | ~~ | FFMQ_1beo.z   | 0.723  | 0.053 | 13.729 | 0.000 | 0.620  | 0.826 | 0.723  | 0.671  | 0.671  |
| 84 | FFMQ_15beo.z  | ~~ | FFMQ_15beo.z  | 0.516  | 0.057 | 9.110  | 0.000 | 0.405  | 0.627 | 0.516  | 0.501  | 0.501  |
| 85 | FFMQ_26beo.z  | ~~ | FFMQ_26beo.z  | 0.658  | 0.067 | 9.808  | 0.000 | 0.527  | 0.790 | 0.658  | 0.681  | 0.681  |
| 86 | FFMQ_31beo.z  | ~~ | FFMQ_31beo.z  | 0.656  | 0.061 | 10.702 | 0.000 | 0.536  | 0.776 | 0.656  | 0.553  | 0.553  |
| 87 | FFMQ_2bes.z   | ~~ | FFMQ_2bes.z   | 0.358  | 0.041 | 8.805  | 0.000 | 0.278  | 0.438 | 0.358  | 0.341  | 0.341  |
| 88 | FFMQ_12besU.z | ~~ | FFMQ_12besU.z | 0.359  | 0.036 | 9.960  | 0.000 | 0.288  | 0.429 | 0.359  | 0.358  | 0.358  |
| 89 | FFMQ_16besU.z | ~~ | FFMQ_16besU.z | 0.188  | 0.031 | 6.086  | 0.000 | 0.127  | 0.248 | 0.188  | 0.185  | 0.185  |
| 90 | FFMQ_37bes.z  | ~~ | FFMQ_37bes.z  | 0.466  | 0.041 | 11.419 | 0.000 | 0.386  | 0.546 | 0.466  | 0.494  | 0.494  |
| 91 | FFMQ_5mahU.z  | ~~ | FFMQ_5mahU.z  | 0.280  | 0.026 | 10.679 | 0.000 | 0.229  | 0.332 | 0.280  | 0.304  | 0.304  |
| 92 | FFMQ_8mahU.z  | ~~ | FFMQ_8mahU.z  | 0.540  | 0.040 | 13.355 | 0.000 | 0.461  | 0.619 | 0.540  | 0.503  | 0.503  |
| 93 | FFMQ_13mahU.z | ~~ | FFMQ_13mahU.z | 0.261  | 0.030 | 8.575  | 0.000 | 0.201  | 0.321 | 0.261  | 0.254  | 0.254  |



|     |               |               |        |       |        |       |        |       |        |        |        |
|-----|---------------|---------------|--------|-------|--------|-------|--------|-------|--------|--------|--------|
| 94  | FFMQ_18mahU.z | FFMQ_18mahU.z | 0.395  | 0.033 | 11.956 | 0.000 | 0.330  | 0.460 | 0.395  | 0.392  | 0.392  |
| 95  | FFMQ_14aobU.z | FFMQ_14aobU.z | 0.667  | 0.057 | 11.643 | 0.000 | 0.555  | 0.780 | 0.667  | 0.475  | 0.475  |
| 96  | FFMQ_17aobU.z | FFMQ_17aobU.z | 0.920  | 0.056 | 16.518 | 0.000 | 0.811  | 1.029 | 0.920  | 0.695  | 0.695  |
| 97  | FFMQ_25aobU.z | FFMQ_25aobU.z | 0.551  | 0.044 | 12.661 | 0.000 | 0.466  | 0.636 | 0.551  | 0.519  | 0.519  |
| 98  | FFMQ_30aobU.z | FFMQ_30aobU.z | 0.311  | 0.040 | 7.797  | 0.000 | 0.233  | 0.389 | 0.311  | 0.251  | 0.251  |
| 99  | FFMQ_19nr.z   | FFMQ_19nr.z   | 0.404  | 0.047 | 8.517  | 0.000 | 0.311  | 0.497 | 0.404  | 0.401  | 0.401  |
| 100 | FFMQ_24nr.z   | FFMQ_24nr.z   | 0.382  | 0.036 | 10.710 | 0.000 | 0.312  | 0.452 | 0.382  | 0.457  | 0.457  |
| 101 | FFMQ_29nr.z   | FFMQ_29nr.z   | 0.544  | 0.042 | 12.890 | 0.000 | 0.461  | 0.627 | 0.544  | 0.621  | 0.621  |
| 102 | FFMQ_33nr.z   | FFMQ_33nr.z   | 0.384  | 0.043 | 8.853  | 0.000 | 0.299  | 0.469 | 0.384  | 0.437  | 0.437  |
| 103 | Verh.z        | Verh.z        | 0.392  | 0.030 | 12.935 | 0.000 | 0.333  | 0.452 | 0.392  | 0.520  | 0.520  |
| 104 | ZielInt       | ZielInt       | 0.264  | 0.032 | 8.369  | 0.000 | 0.202  | 0.326 | 0.230  | 0.230  | 0.230  |
| 105 | VhInt         | VhInt         | 0.328  | 0.036 | 9.207  | 0.000 | 0.258  | 0.398 | 0.232  | 0.232  | 0.232  |
| 106 | ImpInt        | ImpInt        | 0.392  | 0.051 | 7.695  | 0.000 | 0.292  | 0.492 | 0.274  | 0.274  | 0.274  |
| 107 | PNorm         | PNorm         | 1.047  | 0.075 | 13.920 | 0.000 | 0.899  | 1.194 | 0.759  | 0.759  | 0.759  |
| 108 | SNorm         | SNorm         | 0.658  | 0.078 | 8.469  | 0.000 | 0.506  | 0.810 | 1.000  | 1.000  | 1.000  |
| 109 | Einst         | Einst         | 0.784  | 0.078 | 10.008 | 0.000 | 0.631  | 0.938 | 1.000  | 1.000  | 1.000  |
| 110 | WVK           | WVK           | 0.516  | 0.078 | 6.653  | 0.000 | 0.364  | 0.669 | 1.000  | 1.000  | 1.000  |
| 111 | Beo           | Beo           | 0.355  | 0.055 | 6.508  | 0.000 | 0.248  | 0.462 | 1.000  | 1.000  | 1.000  |
| 112 | Bes           | Bes           | 0.691  | 0.058 | 11.879 | 0.000 | 0.577  | 0.805 | 1.000  | 1.000  | 1.000  |
| 113 | Mah           | Mah           | 0.643  | 0.049 | 13.121 | 0.000 | 0.547  | 0.739 | 1.000  | 1.000  | 1.000  |
| 114 | Aob           | Aob           | 0.738  | 0.077 | 9.582  | 0.000 | 0.587  | 0.889 | 1.000  | 1.000  | 1.000  |
| 115 | Nr            | Nr            | 0.604  | 0.059 | 10.175 | 0.000 | 0.487  | 0.720 | 1.000  | 1.000  | 1.000  |
| 116 | SNorm         | Beo           | 0.058  | 0.026 | 2.247  | 0.025 | 0.007  | 0.109 | 0.121  | 0.121  | 0.121  |
| 117 | SNorm         | Bes           | -0.007 | 0.033 | -0.214 | 0.831 | -0.071 | 0.057 | -0.010 | -0.010 | -0.010 |
| 118 | SNorm         | Mah           | -0.016 | 0.033 | -0.499 | 0.618 | -0.080 | 0.048 | -0.025 | -0.025 | -0.025 |
| 119 | SNorm         | Aob           | 0.037  | 0.034 | 1.066  | 0.287 | -0.031 | 0.104 | 0.053  | 0.053  | 0.053  |
| 120 | SNorm         | Nr            | 0.027  | 0.032 | 0.828  | 0.408 | -0.036 | 0.090 | 0.042  | 0.042  | 0.042  |
| 121 | Einst         | Beo           | 0.035  | 0.025 | 1.383  | 0.167 | -0.015 | 0.085 | 0.067  | 0.067  | 0.067  |
| 122 | Einst         | Bes           | 0.000  | 0.031 | -0.014 | 0.989 | -0.062 | 0.061 | -0.001 | -0.001 | -0.001 |
| 123 | Einst         | Mah           | -0.001 | 0.031 | -0.044 | 0.965 | -0.063 | 0.060 | -0.002 | -0.002 | -0.002 |
| 124 | Einst         | Aob           | 0.042  | 0.035 | 1.177  | 0.239 | -0.028 | 0.111 | 0.055  | 0.055  | 0.055  |
| 125 | Einst         | Nr            | -0.046 | 0.031 | -1.465 | 0.143 | -0.107 | 0.015 | -0.067 | -0.067 | -0.067 |
| 126 | WVK           | Beo           | 0.035  | 0.022 | 1.575  | 0.115 | -0.009 | 0.078 | 0.081  | 0.081  | 0.081  |
| 127 | WVK           | Bes           | 0.035  | 0.030 | 1.151  | 0.250 | -0.024 | 0.094 | 0.058  | 0.058  | 0.058  |
| 128 | WVK           | Mah           | 0.033  | 0.029 | 1.117  | 0.264 | -0.025 | 0.090 | 0.057  | 0.057  | 0.057  |
| 129 | WVK           | Aob           | 0.059  | 0.033 | 1.779  | 0.075 | -0.006 | 0.125 | 0.096  | 0.096  | 0.096  |
| 130 | WVK           | Nr            | 0.068  | 0.032 | 2.151  | 0.031 | 0.006  | 0.130 | 0.122  | 0.122  | 0.122  |
| 131 | Beo           | Bes           | 0.129  | 0.032 | 4.061  | 0.000 | 0.067  | 0.192 | 0.261  | 0.261  | 0.261  |
| 132 | Beo           | Mah           | 0.086  | 0.029 | 2.953  | 0.003 | 0.029  | 0.142 | 0.179  | 0.179  | 0.179  |
| 133 | Beo           | Aob           | 0.043  | 0.029 | 1.477  | 0.140 | -0.014 | 0.101 | 0.084  | 0.084  | 0.084  |
| 134 | Beo           | Nr            | 0.115  | 0.030 | 3.796  | 0.000 | 0.056  | 0.174 | 0.248  | 0.248  | 0.248  |
| 135 | Bes           | Mah           | 0.280  | 0.035 | 8.083  | 0.000 | 0.212  | 0.348 | 0.420  | 0.420  | 0.420  |
| 136 | Bes           | Aob           | 0.273  | 0.041 | 6.726  | 0.000 | 0.194  | 0.353 | 0.383  | 0.383  | 0.383  |
| 137 | Bes           | Nr            | 0.175  | 0.034 | 5.118  | 0.000 | 0.108  | 0.242 | 0.272  | 0.272  | 0.272  |
| 138 | Mah           | Aob           | 0.379  | 0.044 | 8.653  | 0.000 | 0.293  | 0.464 | 0.549  | 0.549  | 0.549  |
| 139 | Mah           | Nr            | 0.254  | 0.034 | 7.470  | 0.000 | 0.187  | 0.321 | 0.408  | 0.408  | 0.408  |
| 140 | Aob           | Nr            | 0.310  | 0.042 | 7.310  | 0.000 | 0.227  | 0.394 | 0.465  | 0.465  | 0.465  |

Model 4: Mindfulness and stage-specific predictors

|    | lhs     | op | rhs           | est    | se    | z      | pvalue | ci.lower | ci.upper | std.lv | std.all | std.nox |
|----|---------|----|---------------|--------|-------|--------|--------|----------|----------|--------|---------|---------|
| 1  | ZielInt | == | ZielInt_1.z   | 1.000  | 0.000 | NA     | NA     | 1.000    | 1.000    | 1.081  | 0.934   | 0.934   |
| 2  | ZielInt | == | ZielInt_2.z   | 0.999  | 0.022 | 45.293 | 0.000  | 0.956    | 1.043    | 1.080  | 0.928   | 0.928   |
| 3  | VhInt   | == | VHInt_1.z     | 1.000  | 0.000 | NA     | NA     | 1.000    | 1.000    | 1.198  | 0.939   | 0.939   |
| 4  | VhInt   | == | VHInt_2.z     | 0.951  | 0.022 | 43.772 | 0.000  | 0.908    | 0.993    | 1.139  | 0.915   | 0.915   |
| 5  | ImpInt  | == | ImpInt_1.z    | 1.000  | 0.000 | NA     | NA     | 1.000    | 1.000    | 1.208  | 0.799   | 0.799   |
| 6  | ImpInt  | == | ImpInt_2.z    | 0.865  | 0.041 | 20.962 | 0.000  | 0.784    | 0.946    | 1.046  | 0.761   | 0.761   |
| 7  | PNorm   | == | PNorm_1.z     | 1.000  | 0.000 | NA     | NA     | 1.000    | 1.000    | 1.176  | 0.885   | 0.885   |
| 8  | PNorm   | == | PNorm_2.z     | 1.004  | 0.026 | 38.677 | 0.000  | 0.953    | 1.055    | 1.181  | 0.916   | 0.916   |
| 9  | SNorm   | == | SNorm_1.z     | 1.000  | 0.000 | NA     | NA     | 1.000    | 1.000    | 0.806  | 0.696   | 0.696   |
| 10 | SNorm   | == | SNorm_2.z     | 1.355  | 0.117 | 11.613 | 0.000  | 1.126    | 1.584    | 1.093  | 0.949   | 0.949   |
| 11 | Einst   | == | Einst_1.z     | 1.000  | 0.000 | NA     | NA     | 1.000    | 1.000    | 0.897  | 0.874   | 0.874   |
| 12 | Einst   | == | Einst_2U.z    | 0.844  | 0.061 | 13.775 | 0.000  | 0.724    | 0.964    | 0.757  | 0.696   | 0.696   |
| 13 | WVK     | == | WVK_1U.z      | 1.000  | 0.000 | NA     | NA     | 1.000    | 1.000    | 0.737  | 0.727   | 0.727   |
| 14 | WVK     | == | WVK_2U.z      | 1.206  | 0.124 | 9.723  | 0.000  | 0.963    | 1.449    | 0.889  | 0.868   | 0.868   |
| 15 | Beo     | == | FFMQ_1beo.z   | 1.000  | 0.000 | NA     | NA     | 1.000    | 1.000    | 0.580  | 0.559   | 0.559   |
| 16 | Beo     | == | FFMQ_15beo.z  | 1.265  | 0.118 | 10.760 | 0.000  | 1.035    | 1.496    | 0.734  | 0.724   | 0.724   |
| 17 | Beo     | == | FFMQ_26beo.z  | 0.954  | 0.109 | 8.768  | 0.000  | 0.741    | 1.168    | 0.554  | 0.563   | 0.563   |
| 18 | Beo     | == | FFMQ_31beo.z  | 1.250  | 0.122 | 10.283 | 0.000  | 1.011    | 1.488    | 0.725  | 0.665   | 0.665   |
| 19 | Bes     | == | FFMQ_2bes.z   | 1.000  | 0.000 | NA     | NA     | 1.000    | 1.000    | 0.832  | 0.812   | 0.812   |
| 20 | Bes     | == | FFMQ_12besU.z | 0.964  | 0.047 | 20.608 | 0.000  | 0.872    | 1.056    | 0.802  | 0.801   | 0.801   |
| 21 | Bes     | == | FFMQ_16besU.z | 1.095  | 0.044 | 24.680 | 0.000  | 1.008    | 1.182    | 0.911  | 0.903   | 0.903   |
| 22 | Bes     | == | FFMQ_37bes.z  | 0.831  | 0.044 | 18.942 | 0.000  | 0.745    | 0.917    | 0.691  | 0.712   | 0.712   |
| 23 | Mah     | == | FFMQ_5mahU.z  | 1.000  | 0.000 | NA     | NA     | 1.000    | 1.000    | 0.802  | 0.835   | 0.835   |
| 24 | Mah     | == | FFMQ_8mahU.z  | 0.911  | 0.050 | 18.085 | 0.000  | 0.812    | 1.010    | 0.731  | 0.705   | 0.705   |
| 25 | Mah     | == | FFMQ_13mahU.z | 1.092  | 0.045 | 24.452 | 0.000  | 1.004    | 1.179    | 0.876  | 0.863   | 0.863   |
| 26 | Mah     | == | FFMQ_18mahU.z | 0.976  | 0.050 | 19.583 | 0.000  | 0.878    | 1.074    | 0.783  | 0.780   | 0.780   |
| 27 | Aob     | == | FFMQ_14aobU.z | 1.000  | 0.000 | NA     | NA     | 1.000    | 1.000    | 0.862  | 0.727   | 0.727   |
| 28 | Aob     | == | FFMQ_17aobU.z | 0.737  | 0.061 | 12.051 | 0.000  | 0.617    | 0.857    | 0.635  | 0.552   | 0.552   |
| 29 | Aob     | == | FFMQ_25aobU.z | 0.828  | 0.055 | 15.128 | 0.000  | 0.721    | 0.935    | 0.713  | 0.692   | 0.692   |
| 30 | Aob     | == | FFMQ_30aobU.z | 1.117  | 0.060 | 18.580 | 0.000  | 0.999    | 1.235    | 0.963  | 0.865   | 0.865   |
| 31 | Nr      | == | FFMQ_19nr.z   | 1.000  | 0.000 | NA     | NA     | 1.000    | 1.000    | 0.781  | 0.778   | 0.778   |
| 32 | Nr      | == | FFMQ_24nr.z   | 0.865  | 0.053 | 16.344 | 0.000  | 0.762    | 0.969    | 0.676  | 0.739   | 0.739   |
| 33 | Nr      | == | FFMQ_29nr.z   | 0.735  | 0.058 | 12.649 | 0.000  | 0.621    | 0.849    | 0.574  | 0.613   | 0.613   |
| 34 | Nr      | == | FFMQ_33nr.z   | 0.896  | 0.059 | 15.205 | 0.000  | 0.780    | 1.011    | 0.699  | 0.746   | 0.746   |
| 35 | Verh.z  | ~  | ImpInt        | 0.502  | 0.031 | 16.010 | 0.000  | 0.440    | 0.563    | 0.607  | 0.694   | 0.694   |
| 36 | ImpInt  | ~  | VhInt         | 0.802  | 0.039 | 20.774 | 0.000  | 0.727    | 0.878    | 0.795  | 0.795   | 0.795   |
| 37 | ImpInt  | ~  | WVK           | 0.187  | 0.068 | 2.735  | 0.006  | 0.053    | 0.322    | 0.114  | 0.114   | 0.114   |
| 38 | VhInt   | ~  | ZielInt       | 0.751  | 0.071 | 10.542 | 0.000  | 0.611    | 0.891    | 0.678  | 0.678   | 0.678   |
| 39 | VhInt   | ~  | WVK           | 0.242  | 0.054 | 4.510  | 0.000  | 0.137    | 0.347    | 0.149  | 0.149   | 0.149   |
| 40 | VhInt   | ~  | PNorm         | 0.169  | 0.070 | 2.414  | 0.016  | 0.032    | 0.306    | 0.166  | 0.166   | 0.166   |
| 41 | ZielInt | ~  | PNorm         | 0.490  | 0.066 | 7.414  | 0.000  | 0.361    | 0.620    | 0.533  | 0.533   | 0.533   |
| 42 | ZielInt | ~  | Einst         | 0.467  | 0.090 | 5.166  | 0.000  | 0.290    | 0.644    | 0.388  | 0.388   | 0.388   |
| 43 | WVK     | ~  | Beo           | 0.140  | 0.072 | 1.941  | 0.052  | -0.001   | 0.281    | 0.110  | 0.110   | 0.110   |
| 44 | WVK     | ~  | Bes           | 0.005  | 0.054 | 0.098  | 0.922  | -0.100   | 0.111    | 0.006  | 0.006   | 0.006   |
| 45 | WVK     | ~  | Mah           | -0.039 | 0.065 | -0.600 | 0.548  | -0.166   | 0.088    | -0.042 | -0.042  | -0.042  |

|    |               |    |               |        |       |        |       |        |       |        |        |        |
|----|---------------|----|---------------|--------|-------|--------|-------|--------|-------|--------|--------|--------|
| 46 | WVK           | ~  | Aob           | 0.064  | 0.065 | 0.996  | 0.319 | -0.062 | 0.191 | 0.075  | 0.075  | 0.075  |
| 47 | WVK           | ~  | Nr            | 0.097  | 0.065 | 1.483  | 0.138 | -0.031 | 0.224 | 0.102  | 0.102  | 0.102  |
| 48 | PNorm         | ~  | SNorm         | 0.658  | 0.068 | 9.704  | 0.000 | 0.525  | 0.791 | 0.451  | 0.451  | 0.451  |
| 49 | PNorm         | ~  | Beo           | 0.610  | 0.118 | 5.170  | 0.000 | 0.378  | 0.841 | 0.301  | 0.301  | 0.301  |
| 50 | PNorm         | ~  | Bes           | -0.082 | 0.070 | -1.176 | 0.239 | -0.218 | 0.055 | -0.058 | -0.058 | -0.058 |
| 51 | PNorm         | ~  | Mah           | -0.103 | 0.082 | -1.250 | 0.211 | -0.264 | 0.058 | -0.070 | -0.070 | -0.070 |
| 52 | PNorm         | ~  | Aob           | 0.098  | 0.082 | 1.196  | 0.232 | -0.063 | 0.259 | 0.072  | 0.072  | 0.072  |
| 53 | PNorm         | ~  | Nr            | -0.006 | 0.079 | -0.077 | 0.939 | -0.160 | 0.148 | -0.004 | -0.004 | -0.004 |
| 54 | Einst         | ~  | Beo           | 0.437  | 0.100 | 4.356  | 0.000 | 0.240  | 0.634 | 0.283  | 0.283  | 0.283  |
| 55 | Einst         | ~  | Bes           | -0.078 | 0.061 | -1.268 | 0.205 | -0.198 | 0.042 | -0.072 | -0.072 | -0.072 |
| 56 | Einst         | ~  | Mah           | -0.072 | 0.074 | -0.976 | 0.329 | -0.216 | 0.073 | -0.064 | -0.064 | -0.064 |
| 57 | Einst         | ~  | Aob           | 0.172  | 0.076 | 2.253  | 0.024 | 0.022  | 0.321 | 0.165  | 0.165  | 0.165  |
| 58 | Einst         | ~  | Nr            | -0.139 | 0.074 | -1.871 | 0.061 | -0.285 | 0.007 | -0.121 | -0.121 | -0.121 |
| 59 | SNorm         | ~  | Beo           | 0.157  | 0.079 | 1.997  | 0.046 | 0.003  | 0.312 | 0.113  | 0.113  | 0.113  |
| 60 | SNorm         | ~  | Bes           | -0.045 | 0.054 | -0.833 | 0.405 | -0.150 | 0.061 | -0.046 | -0.046 | -0.046 |
| 61 | SNorm         | ~  | Mah           | -0.087 | 0.067 | -1.288 | 0.198 | -0.219 | 0.045 | -0.086 | -0.086 | -0.086 |
| 62 | SNorm         | ~  | Aob           | 0.095  | 0.062 | 1.540  | 0.124 | -0.026 | 0.216 | 0.101  | 0.101  | 0.101  |
| 63 | SNorm         | ~  | Nr            | 0.012  | 0.063 | 0.195  | 0.845 | -0.112 | 0.136 | 0.012  | 0.012  | 0.012  |
| 64 | Einst         | ~~ | WVK           | 0.155  | 0.039 | 3.979  | 0.000 | 0.079  | 0.231 | 0.249  | 0.249  | 0.249  |
| 65 | PNorm         | ~~ | Einst         | 0.527  | 0.056 | 9.362  | 0.000 | 0.417  | 0.637 | 0.632  | 0.632  | 0.632  |
| 66 | SNorm         | ~~ | Einst         | 0.319  | 0.047 | 6.780  | 0.000 | 0.227  | 0.411 | 0.465  | 0.465  | 0.465  |
| 67 | PNorm         | ~~ | WVK           | 0.149  | 0.040 | 3.686  | 0.000 | 0.070  | 0.228 | 0.212  | 0.212  | 0.212  |
| 68 | SNorm         | ~~ | WVK           | 0.123  | 0.034 | 3.654  | 0.000 | 0.057  | 0.189 | 0.213  | 0.213  | 0.213  |
| 69 | ZielInt_1.z   | ~~ | ZielInt_1.z   | 0.172  | 0.022 | 7.669  | 0.000 | 0.128  | 0.216 | 0.172  | 0.128  | 0.128  |
| 70 | ZielInt_2.z   | ~~ | ZielInt_2.z   | 0.188  | 0.035 | 5.372  | 0.000 | 0.119  | 0.256 | 0.188  | 0.139  | 0.139  |
| 71 | VHInt_1.z     | ~~ | VHInt_1.z     | 0.193  | 0.030 | 6.382  | 0.000 | 0.134  | 0.253 | 0.193  | 0.119  | 0.119  |
| 72 | VHInt_2.z     | ~~ | VHInt_2.z     | 0.252  | 0.033 | 7.526  | 0.000 | 0.186  | 0.318 | 0.252  | 0.163  | 0.163  |
| 73 | ImpInt_1.z    | ~~ | ImpInt_1.z    | 0.826  | 0.069 | 12.027 | 0.000 | 0.691  | 0.961 | 0.826  | 0.361  | 0.361  |
| 74 | ImpInt_2.z    | ~~ | ImpInt_2.z    | 0.795  | 0.084 | 9.510  | 0.000 | 0.631  | 0.958 | 0.795  | 0.421  | 0.421  |
| 75 | PNorm_1.z     | ~~ | PNorm_1.z     | 0.382  | 0.047 | 8.142  | 0.000 | 0.290  | 0.474 | 0.382  | 0.216  | 0.216  |
| 76 | PNorm_2.z     | ~~ | PNorm_2.z     | 0.268  | 0.036 | 7.519  | 0.000 | 0.198  | 0.338 | 0.268  | 0.161  | 0.161  |
| 77 | SNorm_1.z     | ~~ | SNorm_1.z     | 0.692  | 0.063 | 10.957 | 0.000 | 0.569  | 0.816 | 0.692  | 0.516  | 0.516  |
| 78 | SNorm_2.z     | ~~ | SNorm_2.z     | 0.133  | 0.107 | 1.245  | 0.213 | -0.076 | 0.342 | 0.133  | 0.100  | 0.100  |
| 79 | Einst_1.z     | ~~ | Einst_1.z     | 0.248  | 0.041 | 6.004  | 0.000 | 0.167  | 0.329 | 0.248  | 0.235  | 0.235  |
| 80 | Einst_2U.z    | ~~ | Einst_2U.z    | 0.609  | 0.065 | 9.372  | 0.000 | 0.482  | 0.736 | 0.609  | 0.515  | 0.515  |
| 81 | WVK_1U.z      | ~~ | WVK_1U.z      | 0.485  | 0.069 | 7.009  | 0.000 | 0.350  | 0.621 | 0.485  | 0.472  | 0.472  |
| 82 | WVK_2U.z      | ~~ | WVK_2U.z      | 0.257  | 0.075 | 3.450  | 0.001 | 0.111  | 0.404 | 0.257  | 0.246  | 0.246  |
| 83 | FFMQ_1beo.z   | ~~ | FFMQ_1beo.z   | 0.742  | 0.052 | 14.237 | 0.000 | 0.640  | 0.844 | 0.742  | 0.688  | 0.688  |
| 84 | FFMQ_15beo.z  | ~~ | FFMQ_15beo.z  | 0.490  | 0.055 | 8.830  | 0.000 | 0.381  | 0.598 | 0.490  | 0.476  | 0.476  |
| 85 | FFMQ_26beo.z  | ~~ | FFMQ_26beo.z  | 0.659  | 0.066 | 10.060 | 0.000 | 0.531  | 0.788 | 0.659  | 0.683  | 0.683  |
| 86 | FFMQ_31beo.z  | ~~ | FFMQ_31beo.z  | 0.661  | 0.060 | 10.928 | 0.000 | 0.542  | 0.780 | 0.661  | 0.557  | 0.557  |
| 87 | FFMQ_2bes.z   | ~~ | FFMQ_2bes.z   | 0.357  | 0.040 | 8.883  | 0.000 | 0.278  | 0.436 | 0.357  | 0.340  | 0.340  |
| 88 | FFMQ_12besU.z | ~~ | FFMQ_12besU.z | 0.359  | 0.036 | 9.979  | 0.000 | 0.288  | 0.429 | 0.359  | 0.358  | 0.358  |
| 89 | FFMQ_16besU.z | ~~ | FFMQ_16besU.z | 0.189  | 0.031 | 6.142  | 0.000 | 0.128  | 0.249 | 0.189  | 0.185  | 0.185  |
| 90 | FFMQ_37bes.z  | ~~ | FFMQ_37bes.z  | 0.466  | 0.041 | 11.441 | 0.000 | 0.386  | 0.546 | 0.466  | 0.494  | 0.494  |
| 91 | FFMQ_5mahU.z  | ~~ | FFMQ_5mahU.z  | 0.280  | 0.026 | 10.712 | 0.000 | 0.229  | 0.332 | 0.280  | 0.304  | 0.304  |
| 92 | FFMQ_8mahU.z  | ~~ | FFMQ_8mahU.z  | 0.539  | 0.040 | 13.333 | 0.000 | 0.460  | 0.618 | 0.539  | 0.502  | 0.502  |
| 93 | FFMQ_13mahU.z | ~~ | FFMQ_13mahU.z | 0.262  | 0.030 | 8.599  | 0.000 | 0.202  | 0.322 | 0.262  | 0.255  | 0.255  |

|     |               |    |               |       |       |        |       |        |       |       |       |       |
|-----|---------------|----|---------------|-------|-------|--------|-------|--------|-------|-------|-------|-------|
| 94  | FFMQ_18mahU.z | ~~ | FFMQ_18mahU.z | 0.395 | 0.033 | 11.989 | 0.000 | 0.330  | 0.459 | 0.395 | 0.392 | 0.392 |
| 95  | FFMQ_14aobU.z | ~~ | FFMQ_14aobU.z | 0.663 | 0.057 | 11.613 | 0.000 | 0.551  | 0.775 | 0.663 | 0.472 | 0.472 |
| 96  | FFMQ_17aobU.z | ~~ | FFMQ_17aobU.z | 0.920 | 0.056 | 16.504 | 0.000 | 0.811  | 1.029 | 0.920 | 0.695 | 0.695 |
| 97  | FFMQ_25aobU.z | ~~ | FFMQ_25aobU.z | 0.553 | 0.044 | 12.628 | 0.000 | 0.467  | 0.639 | 0.553 | 0.521 | 0.521 |
| 98  | FFMQ_30aobU.z | ~~ | FFMQ_30aobU.z | 0.313 | 0.040 | 7.769  | 0.000 | 0.234  | 0.391 | 0.313 | 0.252 | 0.252 |
| 99  | FFMQ_19nr.z   | ~~ | FFMQ_19nr.z   | 0.398 | 0.048 | 8.287  | 0.000 | 0.304  | 0.492 | 0.398 | 0.395 | 0.395 |
| 100 | FFMQ_24nr.z   | ~~ | FFMQ_24nr.z   | 0.379 | 0.036 | 10.595 | 0.000 | 0.309  | 0.449 | 0.379 | 0.453 | 0.453 |
| 101 | FFMQ_29nr.z   | ~~ | FFMQ_29nr.z   | 0.547 | 0.042 | 12.878 | 0.000 | 0.464  | 0.630 | 0.547 | 0.624 | 0.624 |
| 102 | FFMQ_33nr.z   | ~~ | FFMQ_33nr.z   | 0.390 | 0.044 | 8.816  | 0.000 | 0.303  | 0.477 | 0.390 | 0.443 | 0.443 |
| 103 | Verh.z        | ~~ | Verh.z        | 0.396 | 0.030 | 13.059 | 0.000 | 0.337  | 0.455 | 0.396 | 0.518 | 0.518 |
| 104 | ZielInt       | ~~ | ZielInt       | 0.278 | 0.032 | 8.709  | 0.000 | 0.216  | 0.341 | 0.238 | 0.238 | 0.238 |
| 105 | VhInt         | ~~ | VhInt         | 0.335 | 0.036 | 9.216  | 0.000 | 0.263  | 0.406 | 0.233 | 0.233 | 0.233 |
| 106 | ImpInt        | ~~ | ImpInt        | 0.416 | 0.052 | 8.020  | 0.000 | 0.314  | 0.518 | 0.285 | 0.285 | 0.285 |
| 107 | PNorm         | ~~ | PNorm         | 0.940 | 0.072 | 13.113 | 0.000 | 0.800  | 1.081 | 0.679 | 0.679 | 0.679 |
| 108 | SNorm         | ~~ | SNorm         | 0.638 | 0.076 | 8.372  | 0.000 | 0.488  | 0.787 | 0.981 | 0.981 | 0.981 |
| 109 | Einst         | ~~ | Einst         | 0.739 | 0.077 | 9.623  | 0.000 | 0.589  | 0.890 | 0.919 | 0.919 | 0.919 |
| 110 | WVK           | ~~ | WVK           | 0.523 | 0.074 | 7.033  | 0.000 | 0.377  | 0.669 | 0.964 | 0.964 | 0.964 |
| 111 | Beo           | ~~ | Beo           | 0.337 | 0.053 | 6.355  | 0.000 | 0.233  | 0.440 | 1.000 | 1.000 | 1.000 |
| 112 | Bes           | ~~ | Bes           | 0.692 | 0.058 | 11.926 | 0.000 | 0.578  | 0.806 | 1.000 | 1.000 | 1.000 |
| 113 | Mah           | ~~ | Mah           | 0.643 | 0.049 | 13.126 | 0.000 | 0.547  | 0.739 | 1.000 | 1.000 | 1.000 |
| 114 | Aob           | ~~ | Aob           | 0.743 | 0.077 | 9.630  | 0.000 | 0.591  | 0.894 | 1.000 | 1.000 | 1.000 |
| 115 | Nr            | ~~ | Nr            | 0.610 | 0.060 | 10.194 | 0.000 | 0.493  | 0.727 | 1.000 | 1.000 | 1.000 |
| 116 | Beo           | ~~ | Bes           | 0.125 | 0.031 | 4.003  | 0.000 | 0.064  | 0.186 | 0.258 | 0.258 | 0.258 |
| 117 | Beo           | ~~ | Mah           | 0.082 | 0.028 | 2.889  | 0.004 | 0.026  | 0.137 | 0.175 | 0.175 | 0.175 |
| 118 | Beo           | ~~ | Aob           | 0.042 | 0.028 | 1.463  | 0.143 | -0.014 | 0.097 | 0.083 | 0.083 | 0.083 |
| 119 | Beo           | ~~ | Nr            | 0.110 | 0.030 | 3.729  | 0.000 | 0.052  | 0.168 | 0.244 | 0.244 | 0.244 |
| 120 | Bes           | ~~ | Mah           | 0.280 | 0.035 | 8.083  | 0.000 | 0.212  | 0.348 | 0.420 | 0.420 | 0.420 |
| 121 | Bes           | ~~ | Aob           | 0.274 | 0.041 | 6.734  | 0.000 | 0.194  | 0.354 | 0.383 | 0.383 | 0.383 |
| 122 | Bes           | ~~ | Nr            | 0.176 | 0.034 | 5.123  | 0.000 | 0.109  | 0.244 | 0.271 | 0.271 | 0.271 |
| 123 | Mah           | ~~ | Aob           | 0.380 | 0.044 | 8.670  | 0.000 | 0.294  | 0.466 | 0.550 | 0.550 | 0.550 |
| 124 | Mah           | ~~ | Nr            | 0.255 | 0.034 | 7.478  | 0.000 | 0.188  | 0.322 | 0.408 | 0.408 | 0.408 |
| 125 | Aob           | ~~ | Nr            | 0.313 | 0.043 | 7.347  | 0.000 | 0.230  | 0.397 | 0.466 | 0.466 | 0.466 |
